# Supplementary material
Source: ML conference proceedings conference paper supplement (https://openreview.net/forum?id=GKOa7yNH8Uh)

# **UWEXP Installation Instruction**

## **Android**

# **UWEXP Installation Instruction**

## **Fitbit (Android)**

# Join Fitbit

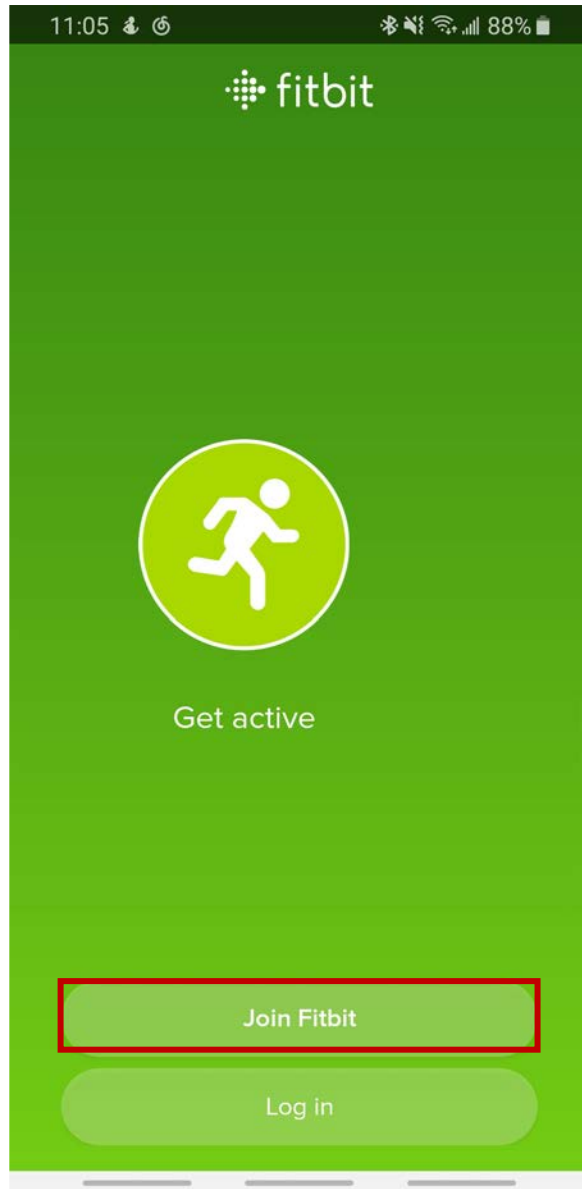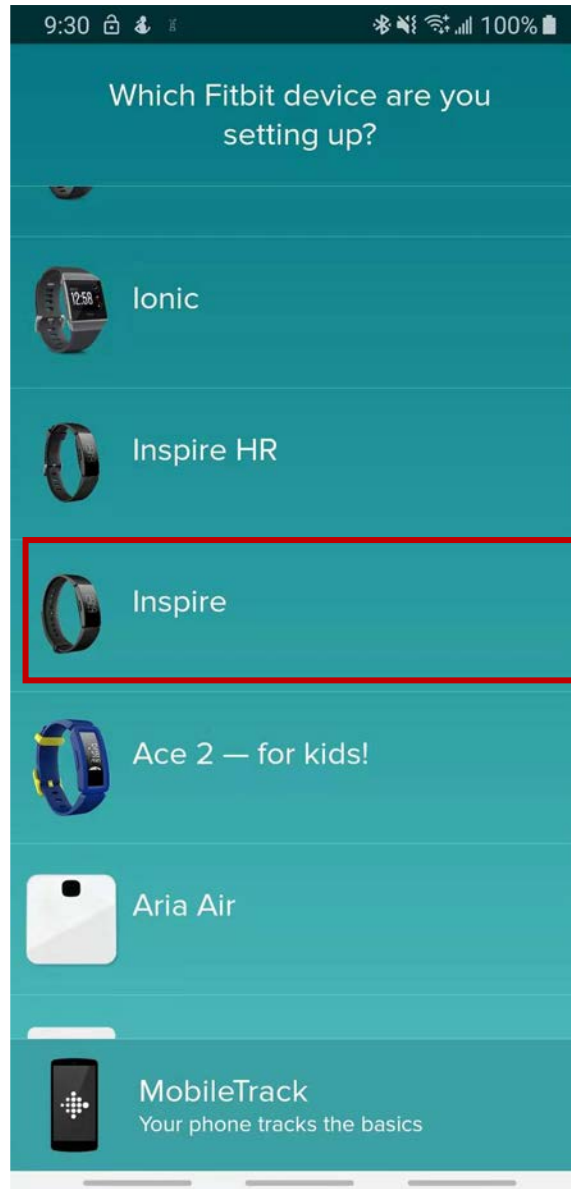

**Select the provided device. (Here using Inspire as an example). If using Flex2, choose it from the list. The remaining steps are similar.**

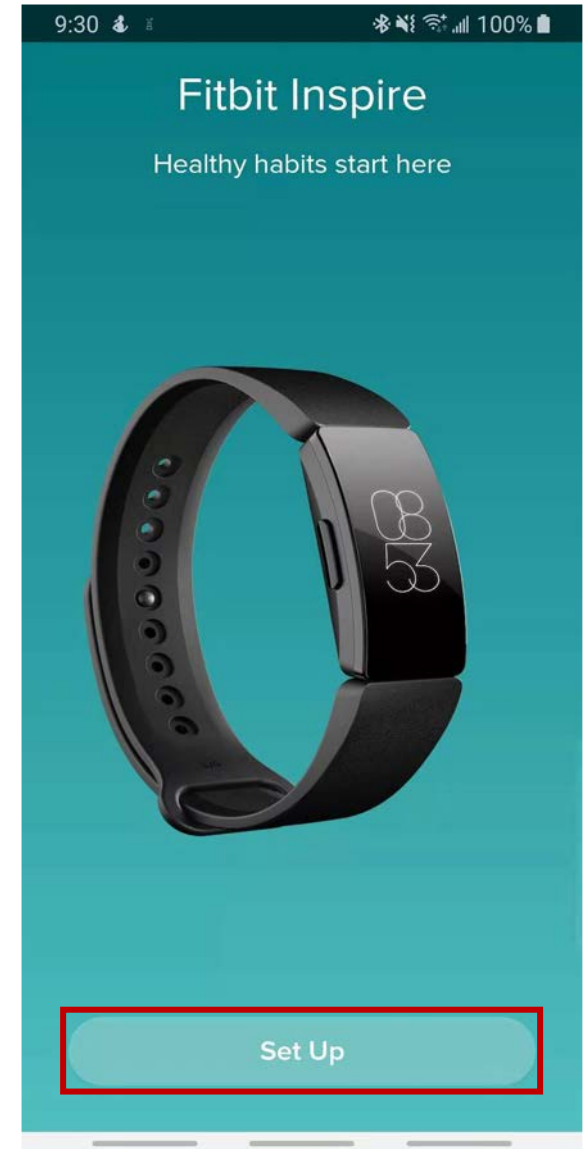

# Join Fitbit

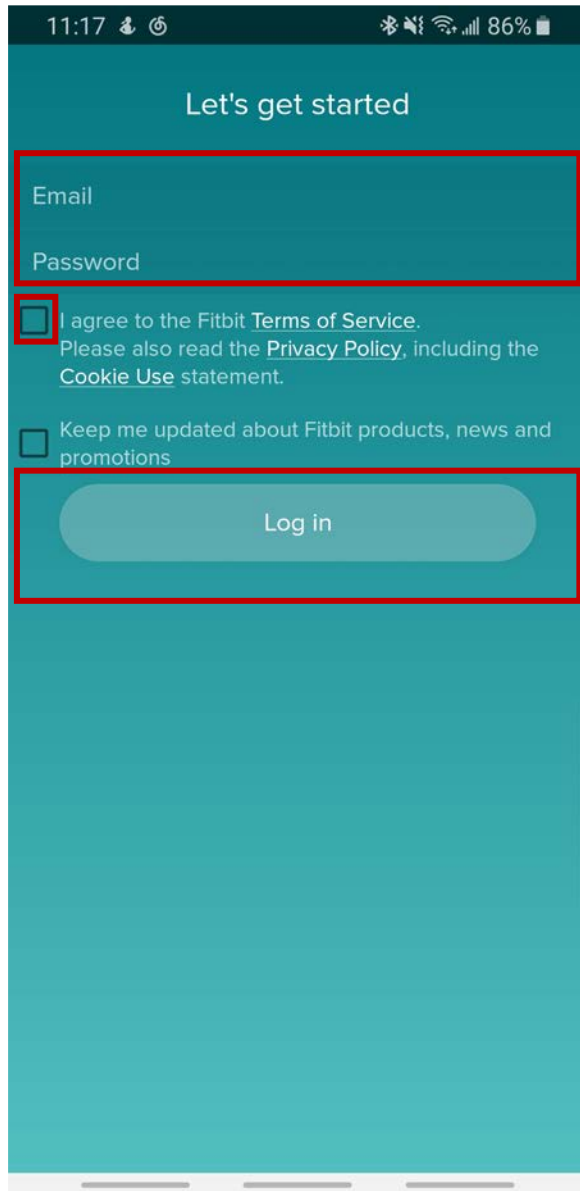

11:17 86%

Let's get started

Email

Password

☐ I agree to the Fitbit [Terms of Service](#). Please also read the [Privacy Policy](#), including the [Cookie Use](#) statement.

☐ Keep me updated about Fitbit products, news and promotions

Log in

**Enter the provided email address and the password. Read Fitbit Terms of Service and check the box**

**Then press Log in to Join Fitbit**

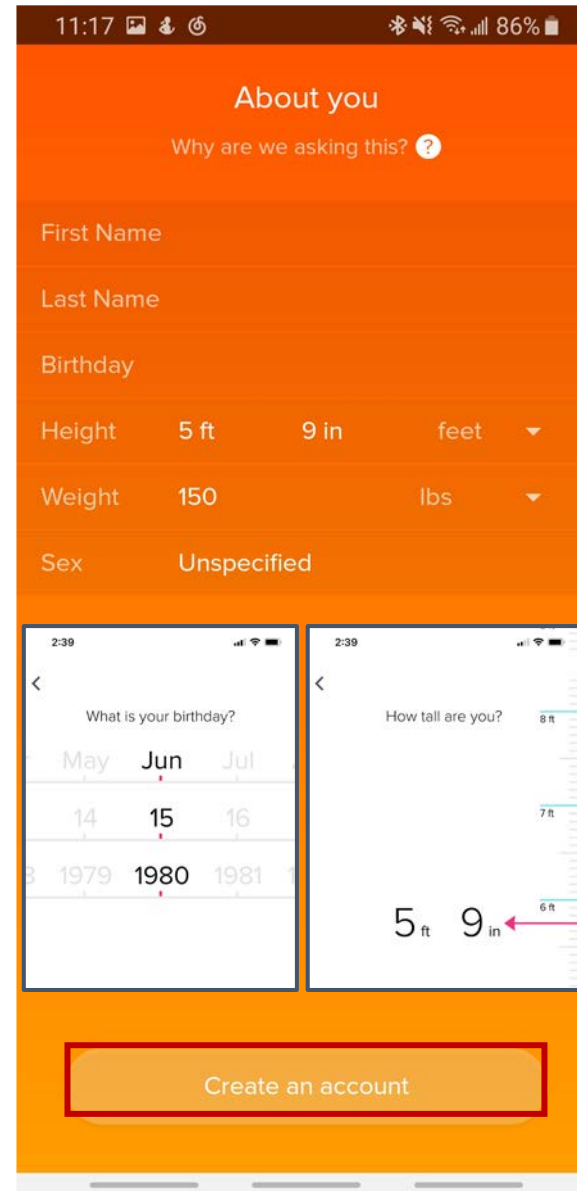

11:17 86%

About you

Why are we asking this? ?

First Name

Last Name

Birthday

Height 5 ft 9 in feet

Weight 150 lbs

Sex Unspecified

What is your birthday?

May Jun Jul

14 15 16

1979 1980 1981

How tall are you?

5 ft 9 in

Create an account

**Enter your information then press Create an account**

# Connect the Fitbit Device

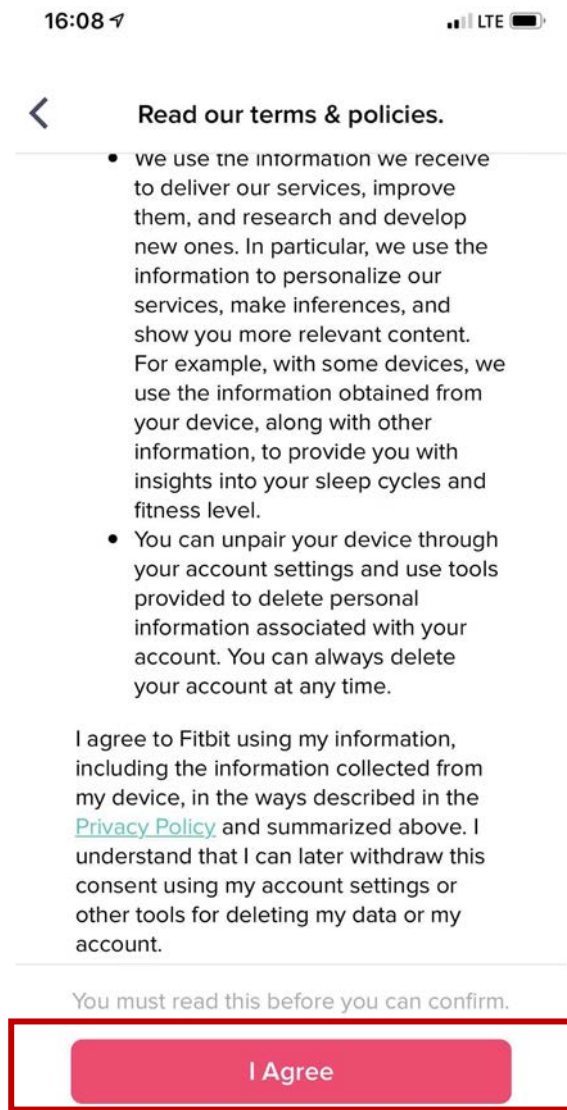

**Scroll to the end after reading**

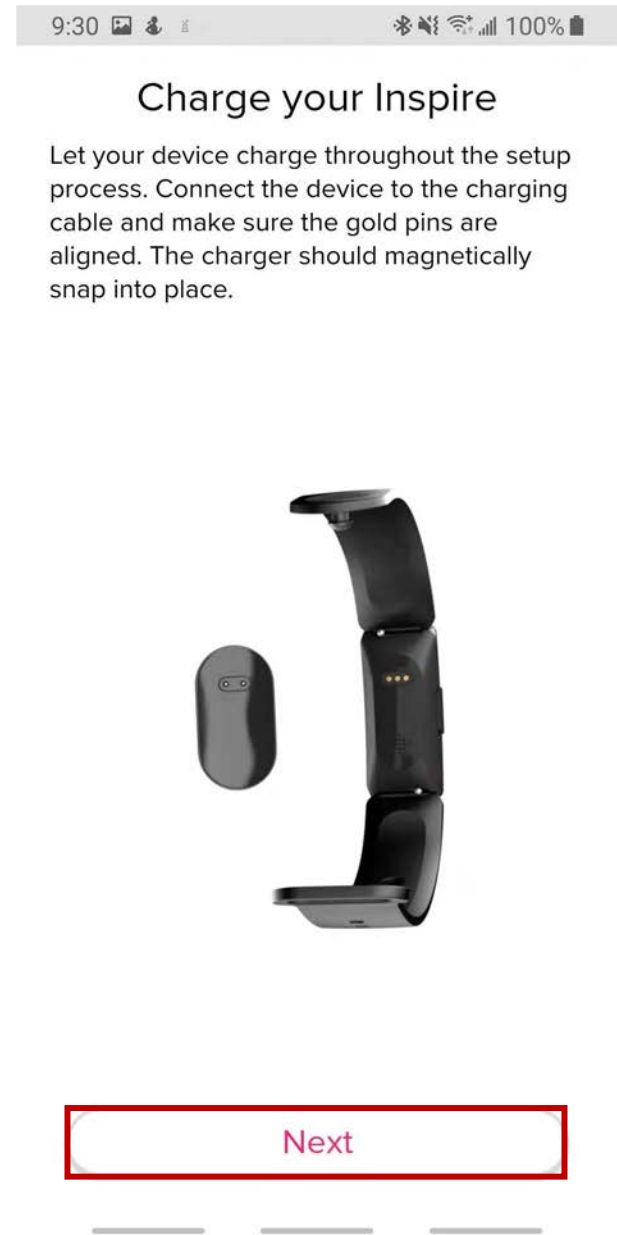

# Connect the Fitbit Device

9:30 AT&T

100%

## Power up

Plug the charging cable into a USB port.  
Connect it to your tracker and make sure the  
gold pins are aligned.

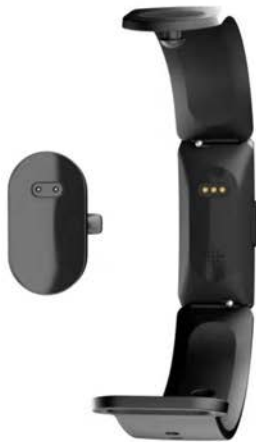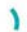

Searching

## Troubleshooting when connecting the Fitbit to the phone

- **Cannot find the device**
  - Quit the pairing and restart the pairing
  - If it did not work, go to somewhere **away from other active Fitbit devices** and restart pairing
  - If it did not work, **kill the Fitbit App at the background** and open it again, then restart pairing.
  - If not work, **turn off and turn on phone Bluetooth.** Next, restart the pairing
- Once found, it should be alright. But note that connecting the device may take several minutes

# Connect the Fitbit Device

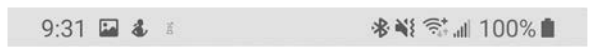

Enter the 4 digits on your device's display

[Not working?](#)

12

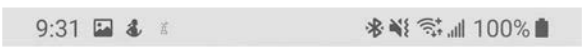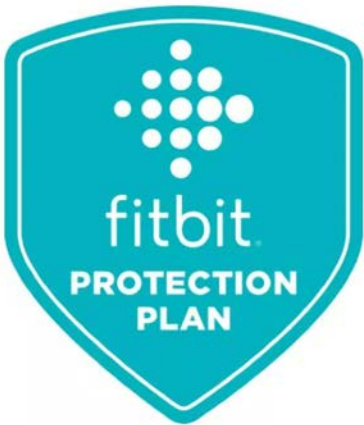

## Protect Your New Device

Covers damage from accidents like drop, spills, and cracked screens from day 1 and mechanical and electrical breakdowns after the Fitbit manufacturer warranty.

Powered by Square Trade

PURCHASE

NOT NOW

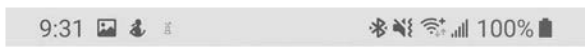

## Try it on.

It's the moment your wrist has been waiting for!.

Wear your device loosely enough to slide up and down your wrist.

During workouts, secure the band so that it lays flat, 2-3 finger-widths above your wrist bone.

## Put on the Fitbit sensor

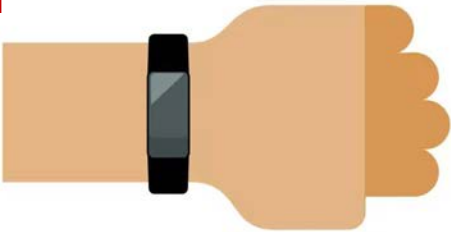

Next

# Connect the Fitbit Device

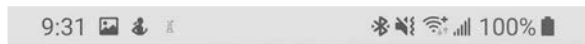

## Change out your band

Swap your band for larger sizes or a variety of stylish accessory options. Fitbit accessories are designed to work best with our products.

Insert the pin in the left hole first.

Keep the band at an upwards angle. Then slide the ball pin inwards while pushing the band into the slot.

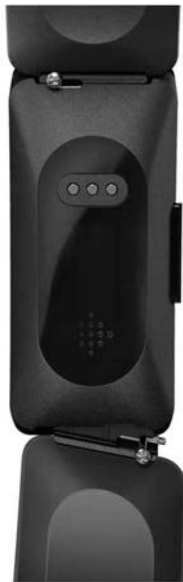

Next

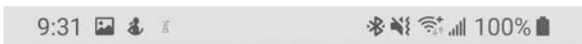

## Swipe up and down

Swipe up to reveal health stats and swipe down to show menu options

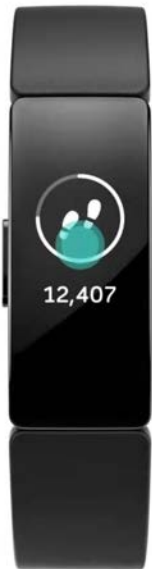

Next

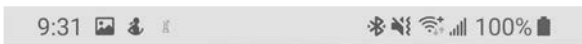

## Tap icon

Opens a feature

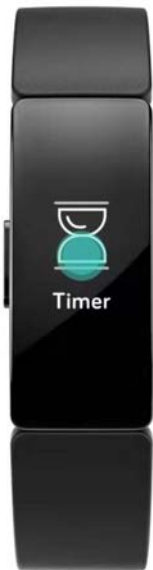

Next

Several Next



# Connect the Fitbit Device

9:31 100%

## Product care tips

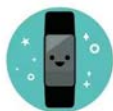

Clean your band and wrist regularly with a soap-free cleanser.

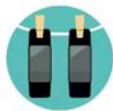

If your device gets wet, remove and dry it completely after your workout.

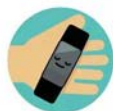

Take your band off from time to time. If your skin gets irritated, be sure to remove your tracker.

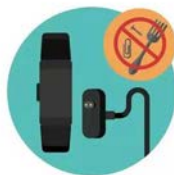

When charging the tracker, make sure there aren't any metal objects such as jewelry near the charger. Once you're done charging, unplug the charger.

Click [here](#) for more product care information.

Next

9:32 100%

## All set!

Now, get moving and make every moment count.

## Several Next

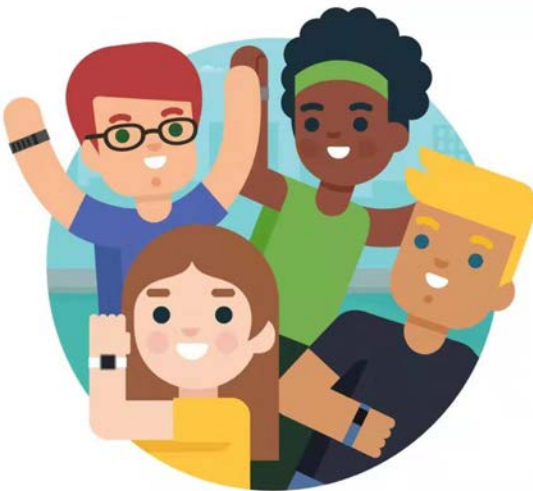

[Learn About Inspire](#)

Done

## All set!

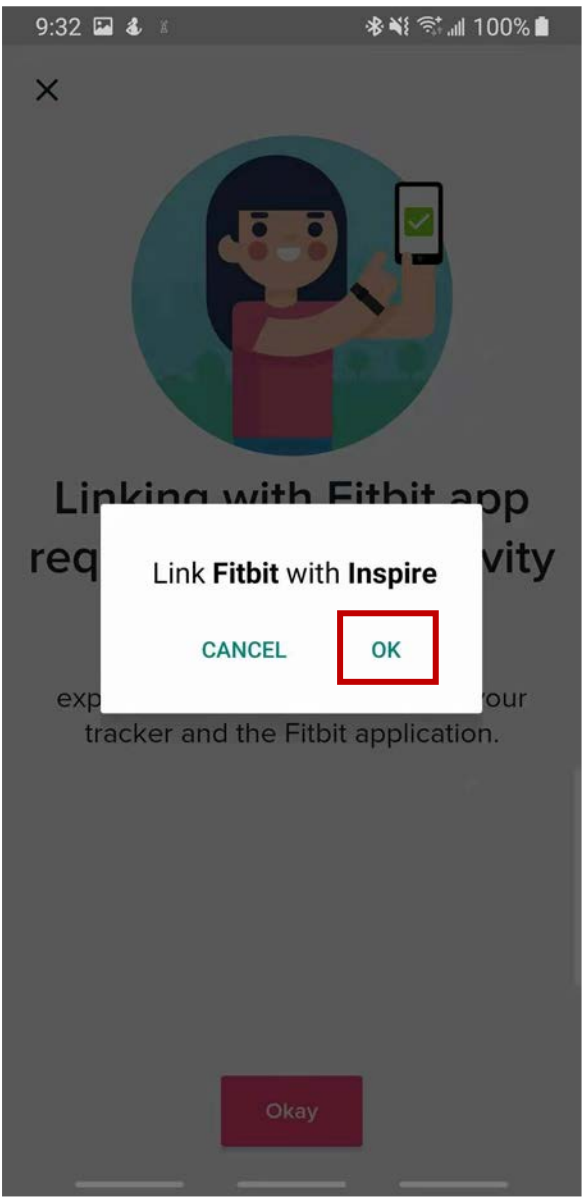

# Turn on the All-Day Sync

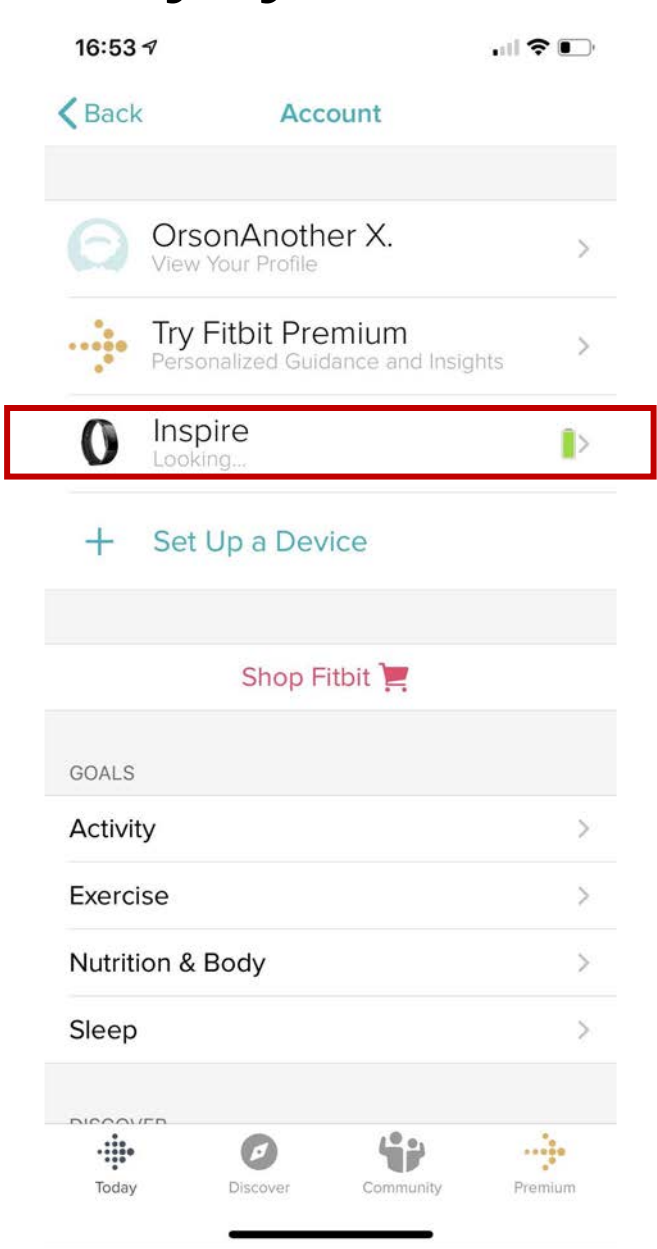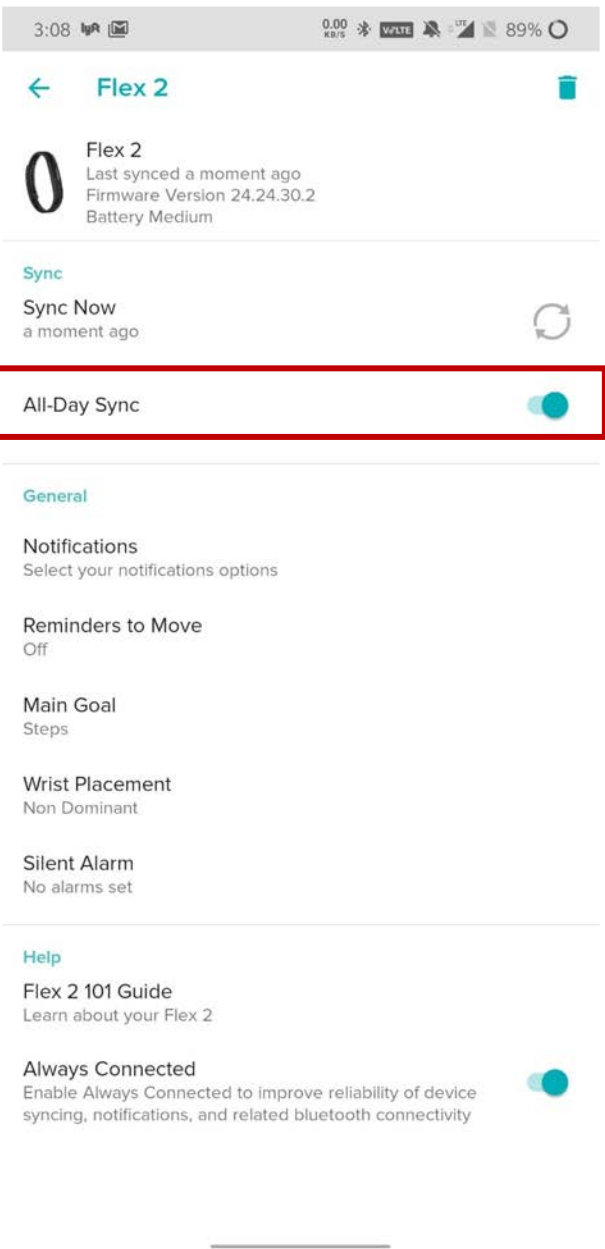

# **UWEXP Installation Instruction**

## **Fitbit (Android)**

# Join Fitbit

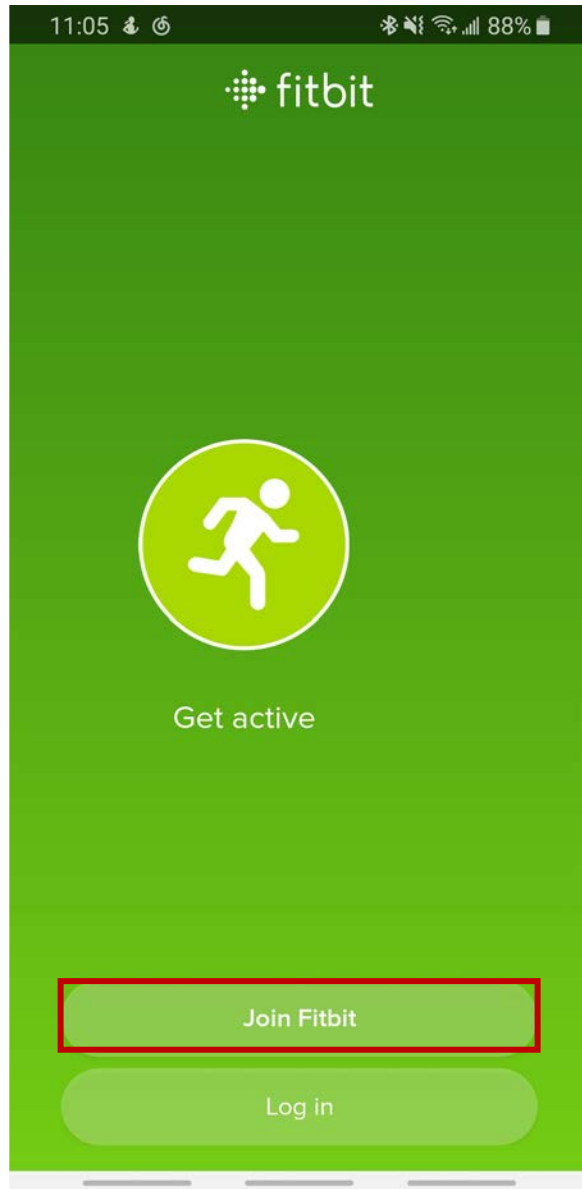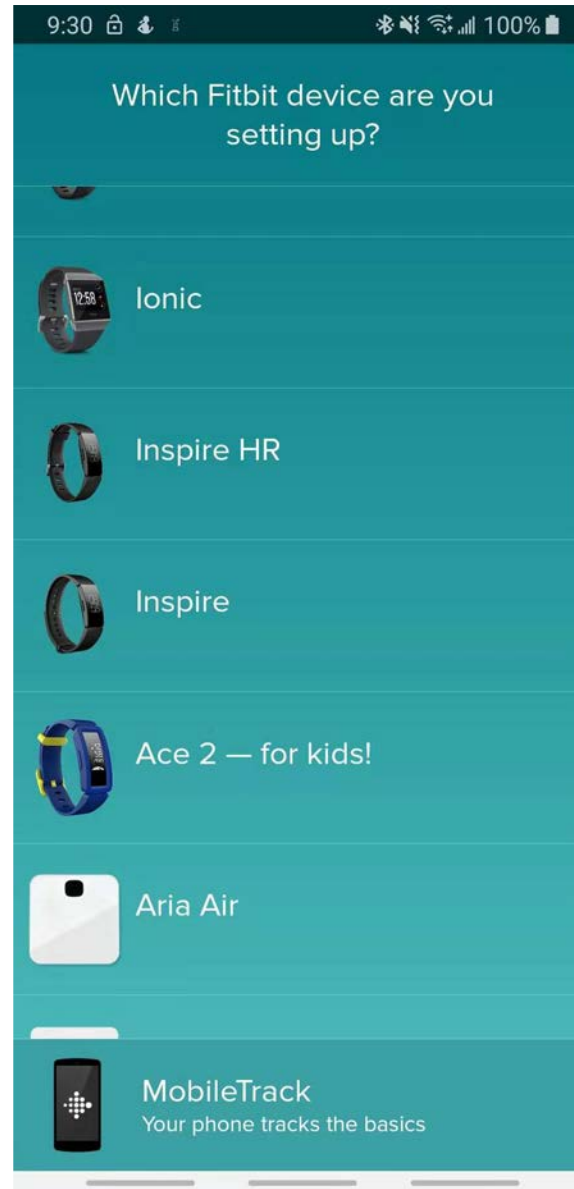

**Select the provided device. (Here using Flex2 as an example). The remaining steps are similar.**

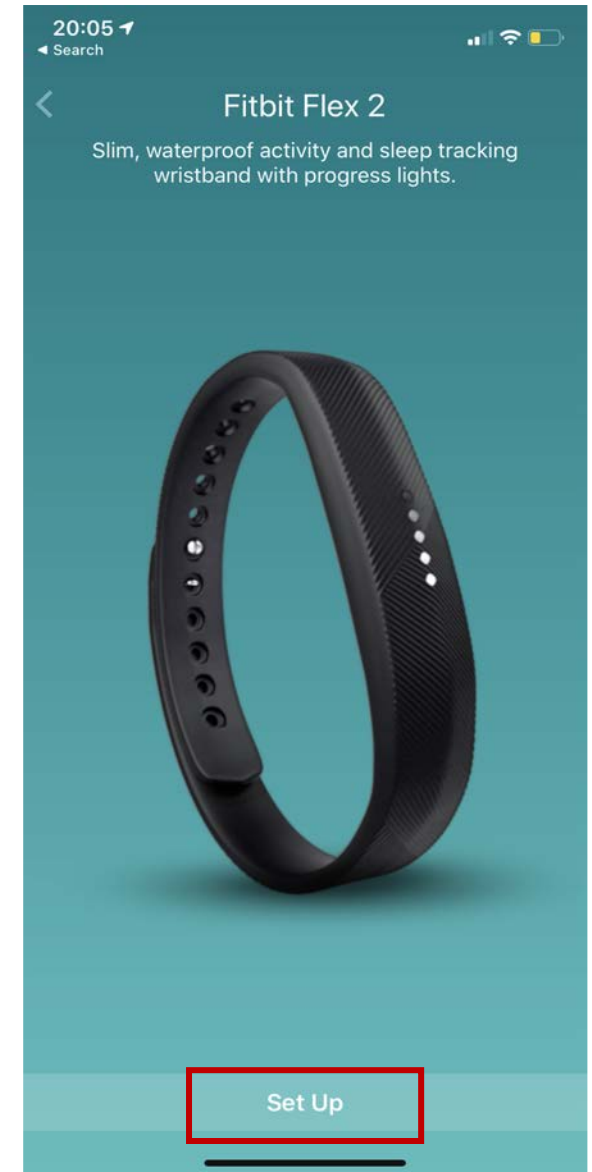

# Join Fitbit

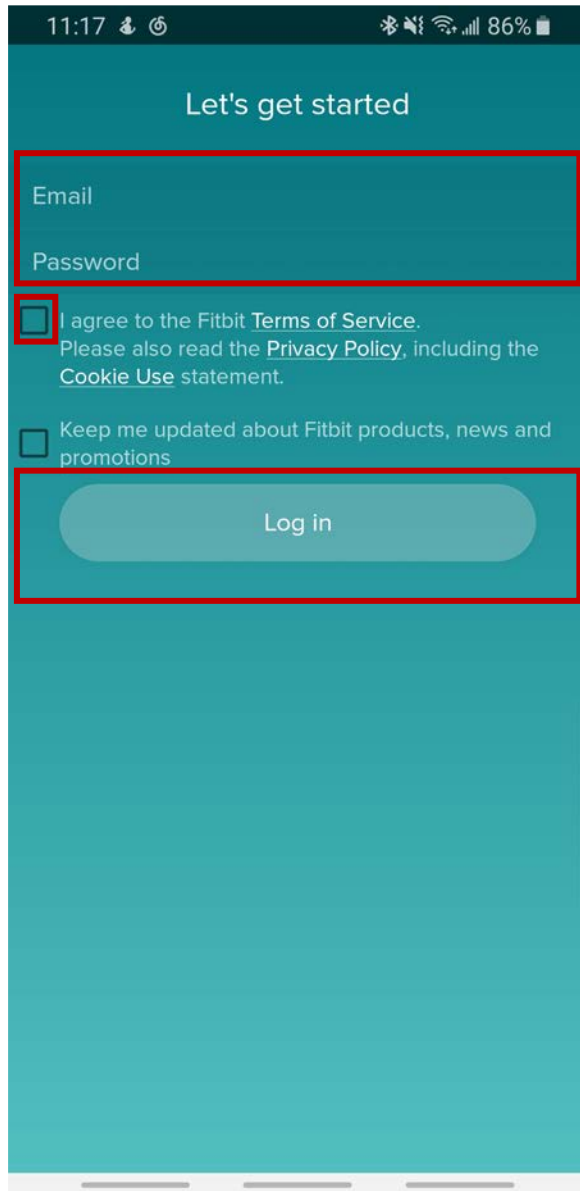

11:17 86%

Let's get started

Email

Password

☐ I agree to the Fitbit [Terms of Service](#). Please also read the [Privacy Policy](#), including the [Cookie Use](#) statement.

☐ Keep me updated about Fitbit products, news and promotions

Log in

**Enter the provided email address and the password. Read Fitbit Terms of Service and check the box**

**Then pressed Log in to Join Fitbit**

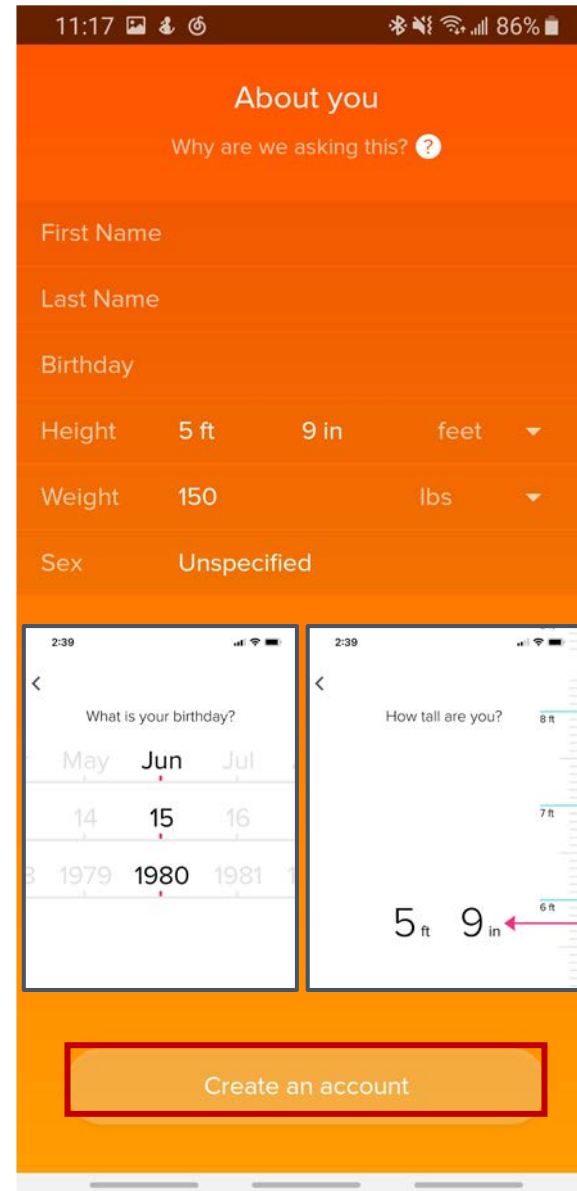

11:17 86%

About you

Why are we asking this? ?

First Name

Last Name

Birthday

Height 5 ft 9 in feet

Weight 150 lbs

Sex Unspecified

What is your birthday?

May Jun Jul

14 15 16

1979 1980 1981

How tall are you?

5 ft 9 in

Create an account

**Enter your information then pressed Create an account**

# Connect the Fitbit Device

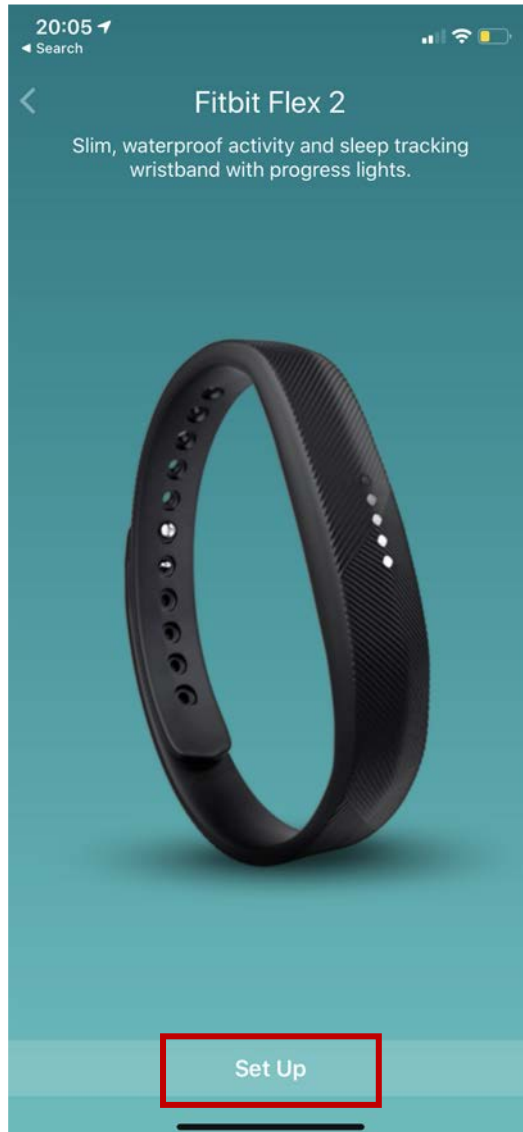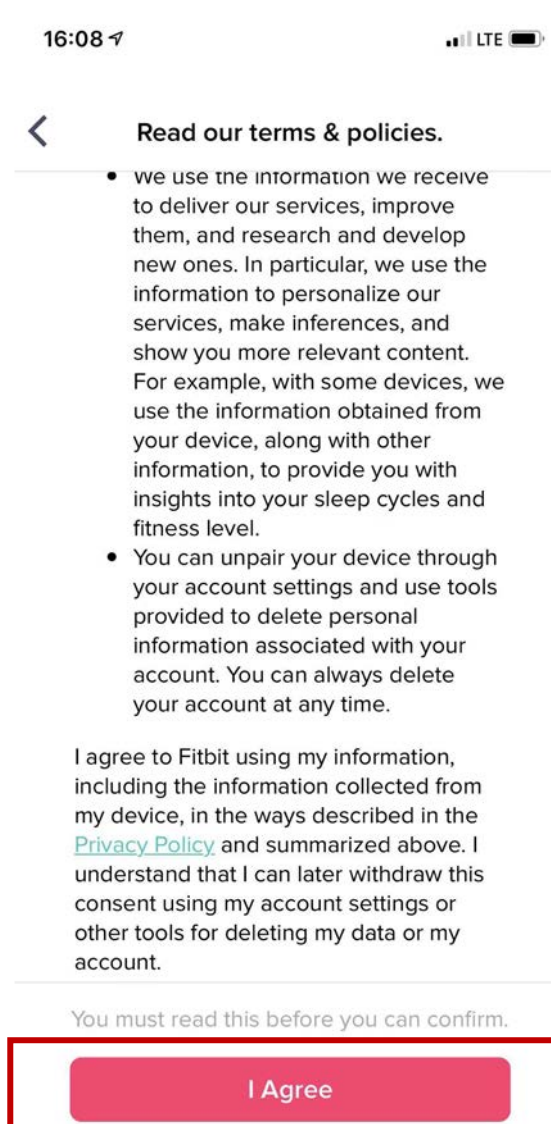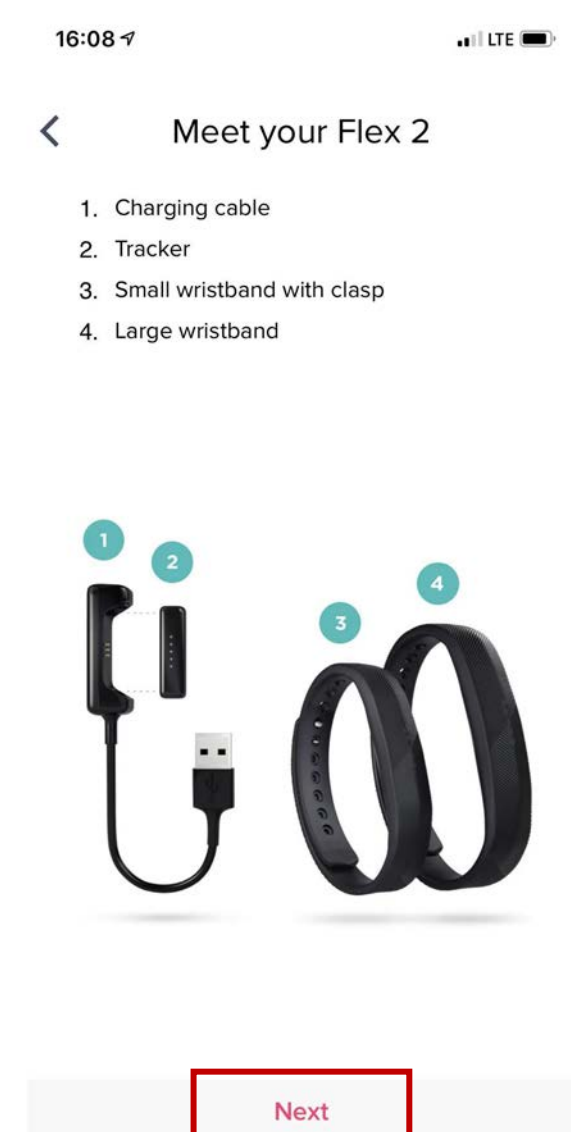

# Connect the Fitbit Device

16:08 16:08 16:08

<

Power up

Put the tracker in the charger to power it up.  
The lights show the charge level.



Next

Several Next

16:08 16:08 16:08

<

Insert tracker

Choose the right sized wristband and slide the tracker in.



Next

16:08 16:08 16:08

<

Put your Flex 2 on

Make sure the clasp and band are lined up and squeeze between your thumb and forefinger until you feel it click.



Next

Put on the  
Fitbit sensor



# Connect the Fitbit Device

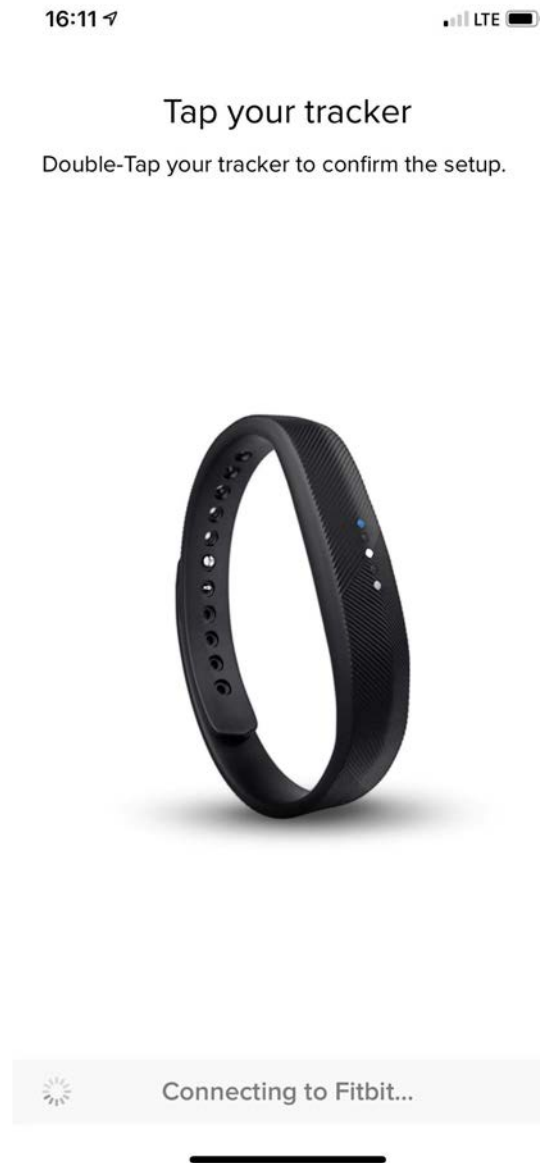

Trouble shooting when connecting the Fitbit to the phone

- **Cannot find the device**
  - Quit the pairing and restart the pairing
  - If not work, go to somewhere **away from other active Fitbit devices** and restart pairing
  - If not work, **kill the Fitbit App at the background** and open it again, then restart pairing.
  - If not work, **turn off and turn on the Bluetooth** of the phone. And restart the pairing
  - If not work, **reset** the Fitbit sensor
    - Connect the sensor to the charging case (connected to power)
    - Press **the small button** at the back of the charging case, hold for 3 seconds
    - Release the button. Put on the Fitbit again and restart the pairing
- Once find, it should be alright. But note that connecting the device may take several minutes



# Connect the Fitbit Device

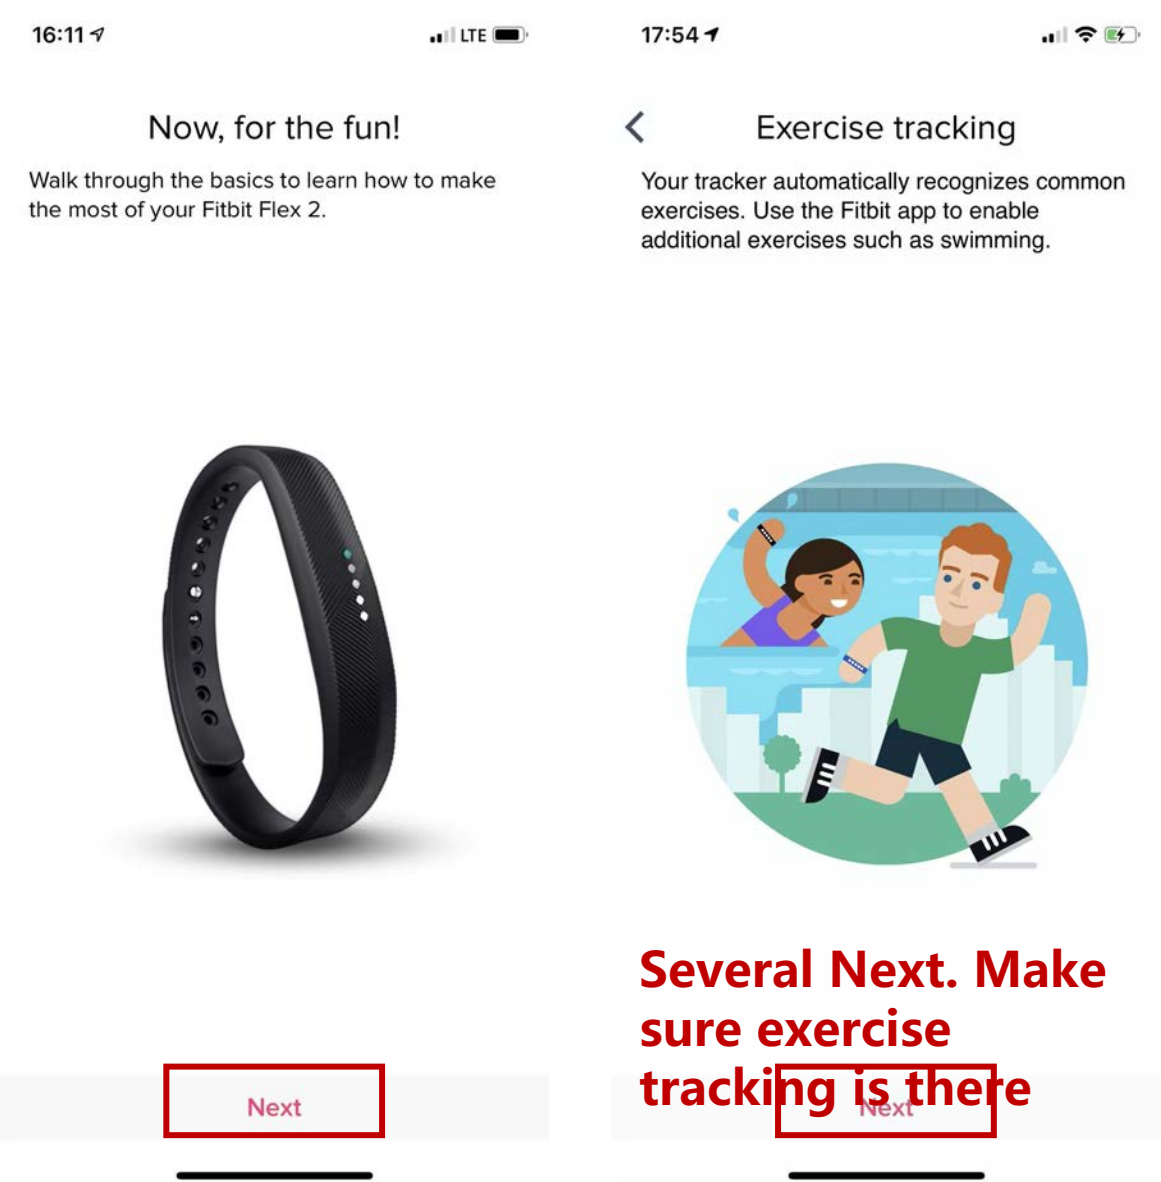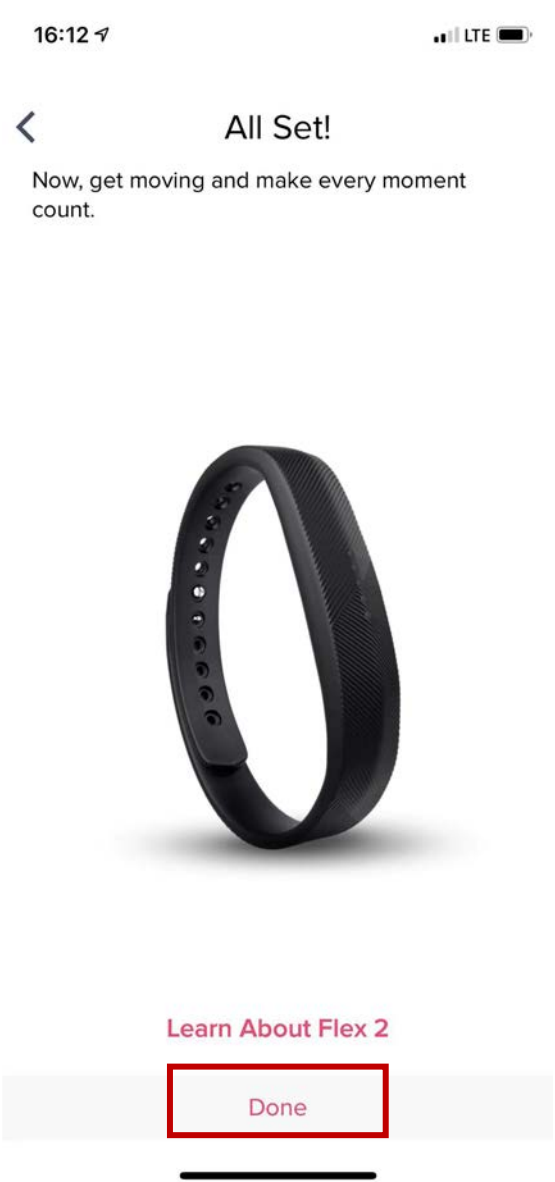

# All set!

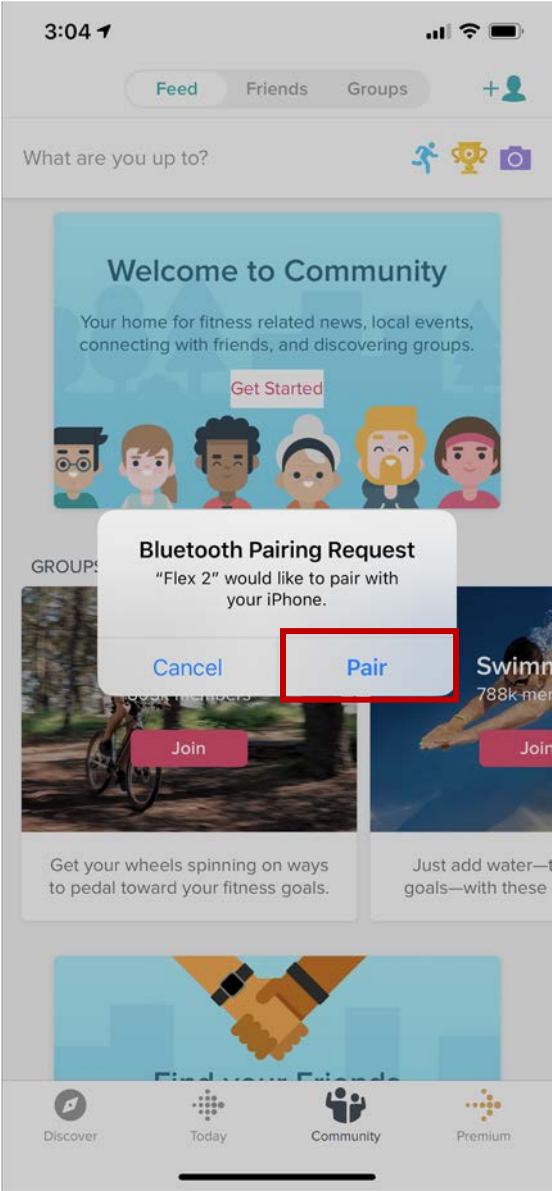

# Turn on the All-Day Sync



# **UWEXP Installation Instruction**

## **Android**

# Download and Install the app

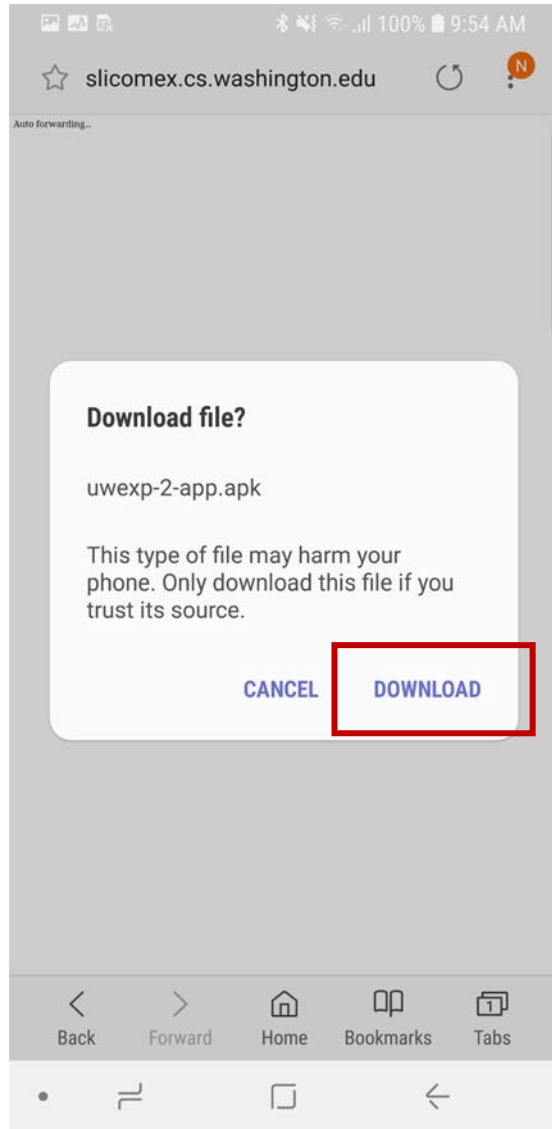

## Download Link

<https://carcharias.cs.washington.edu/awaredashboard/public/APP/uwexp2021c.apk>

NOTE: If you run into this, please check the settings of the browser, and make sure the phone can download the app

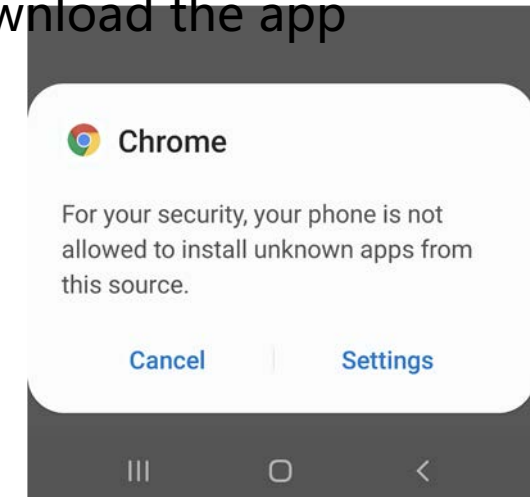

# Install and give permission to the App

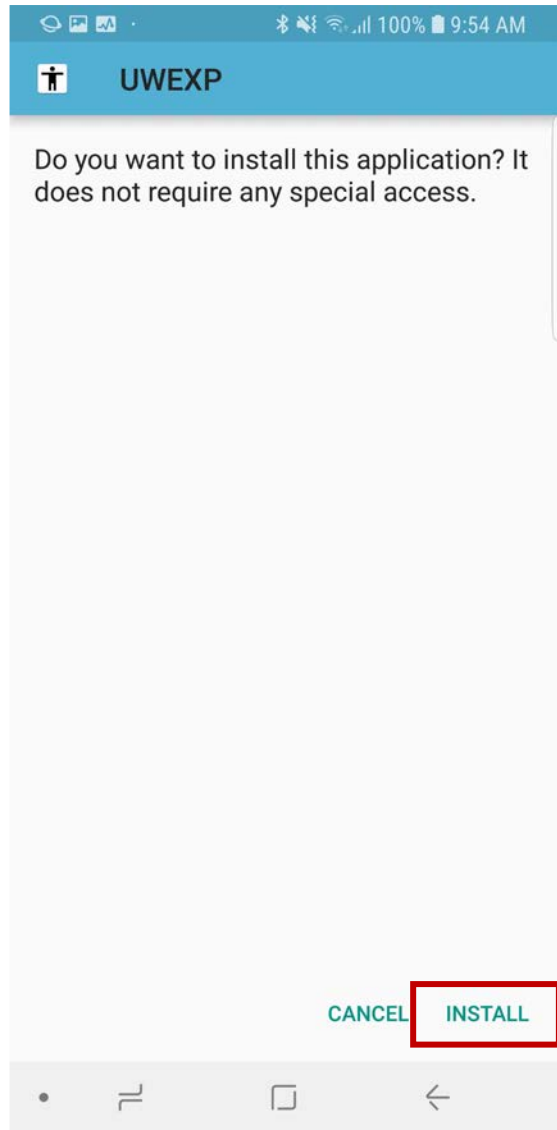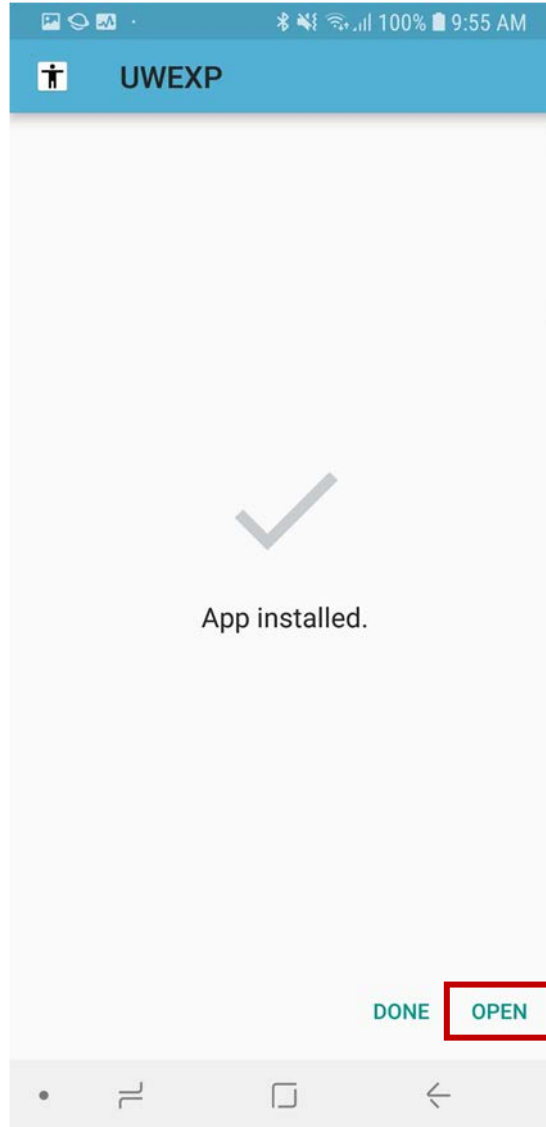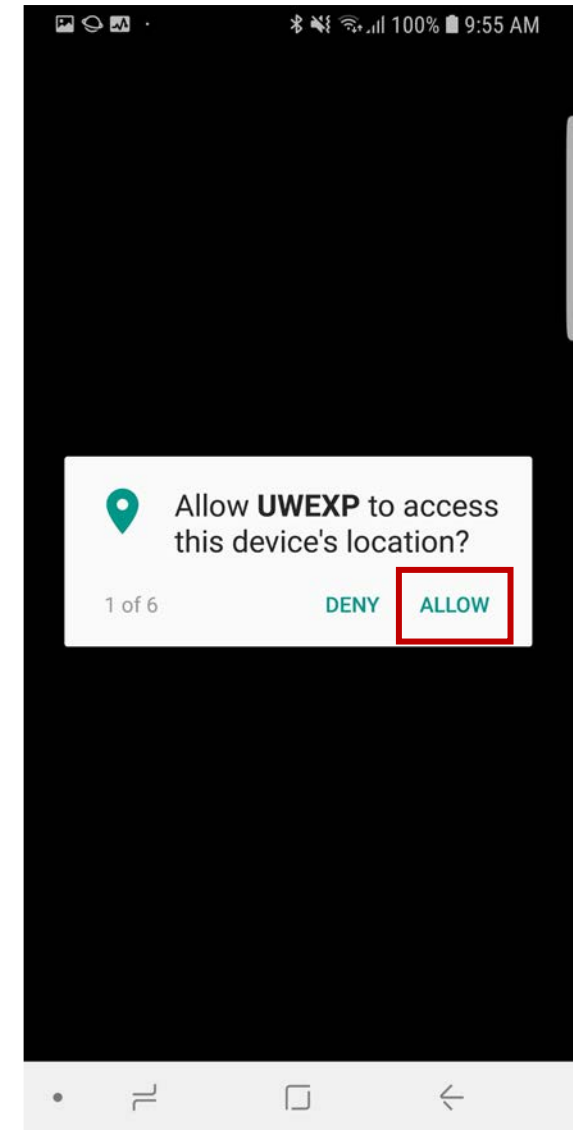

# Join the study

11:18 98%

UWEXP

**Device ID**  
92729612-  
ada6-4438-821e-9176b8b5cdc3

**Participant ID**  
Enter your participant id here

Save

Open Survey

Refresh Fitbit Token

**Enter 4-digits  
Participant ID  
then Press Save**

7:50 Wed, December 16 95%

SmartThings

UWEXP2021 7:30 PM  
**AWARE**  
Tap and enable AWARE accessibility service.

UWEXP2021 7:30 PM  
**Doze**  
Tap and add to the ignore battery optimizations' list.

UWEXP2021  
**AWARE**  
Initializing AWARE...

Samsung Health  
**41 steps**  
Target steps 6000.

Phone

Notification settings Clear

Emergency calls only

# Activate accessibility service

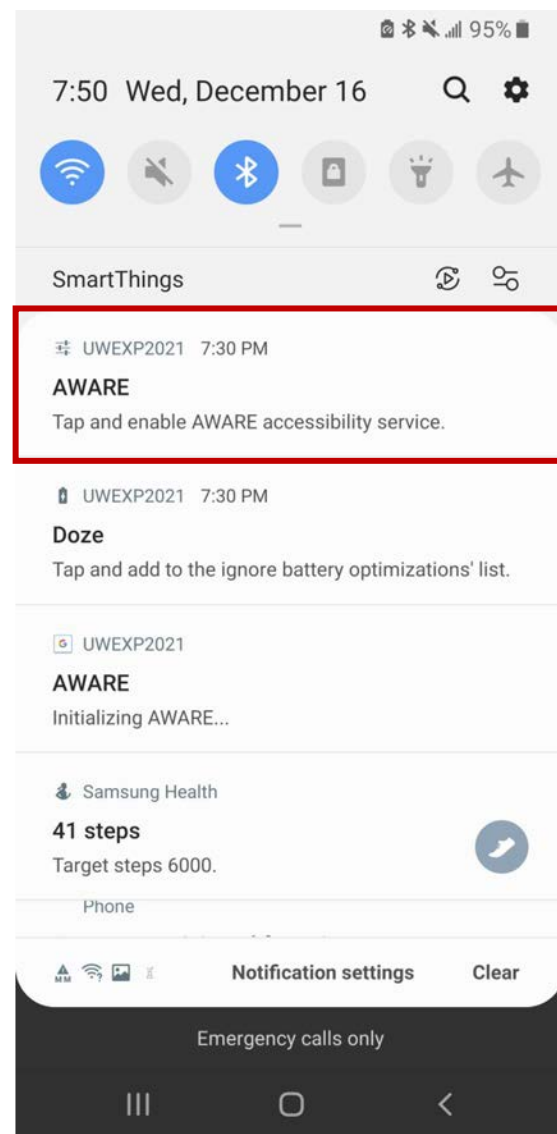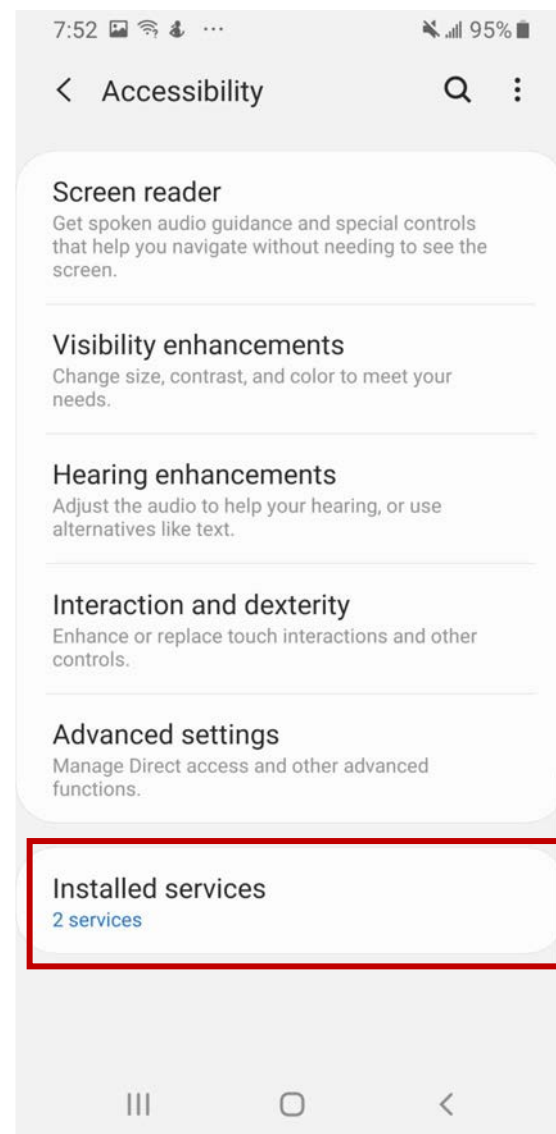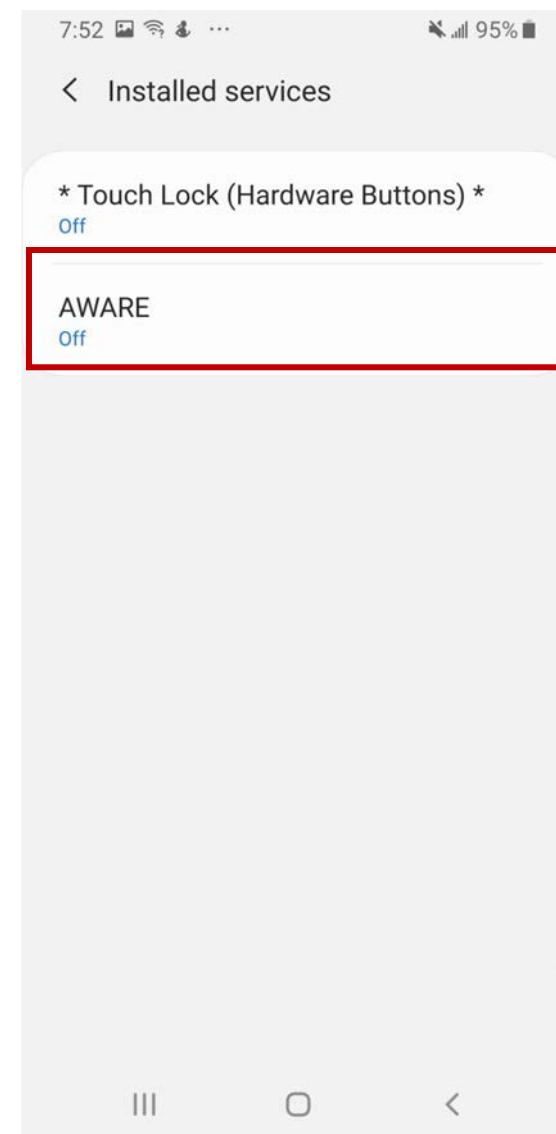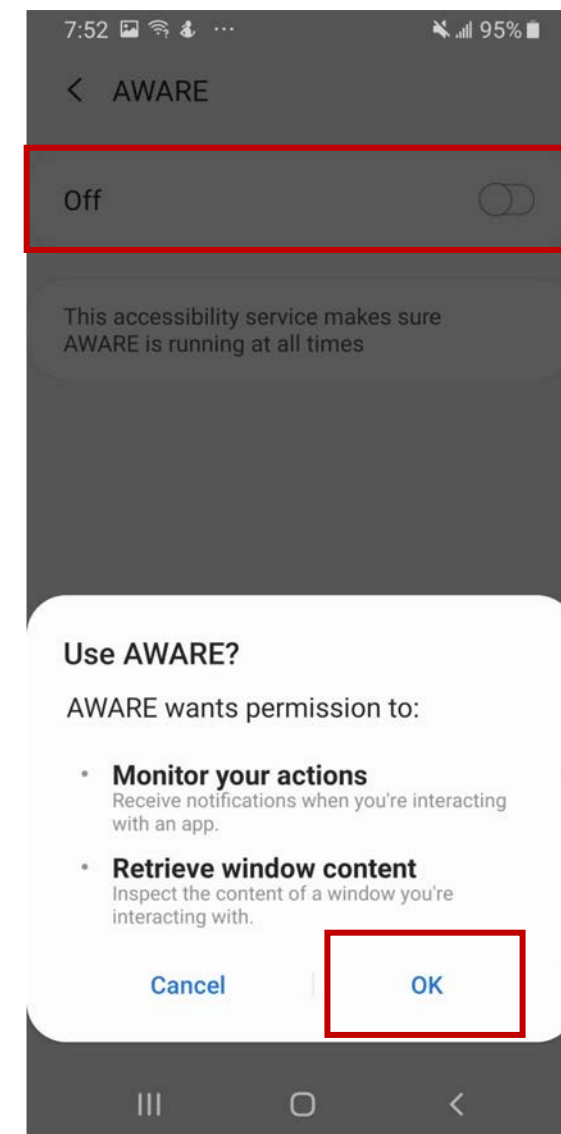

# Ignore battery optimization

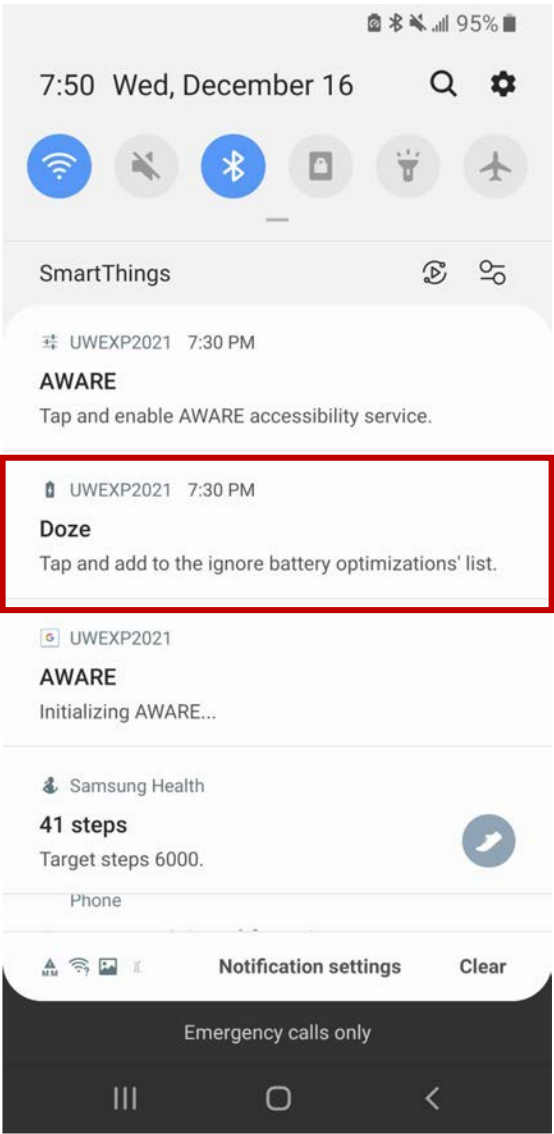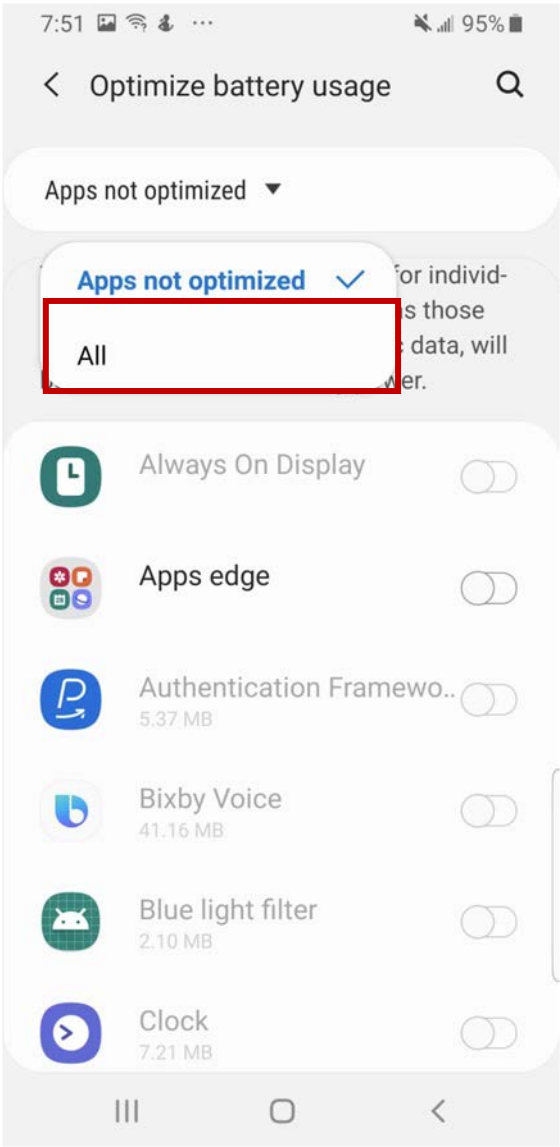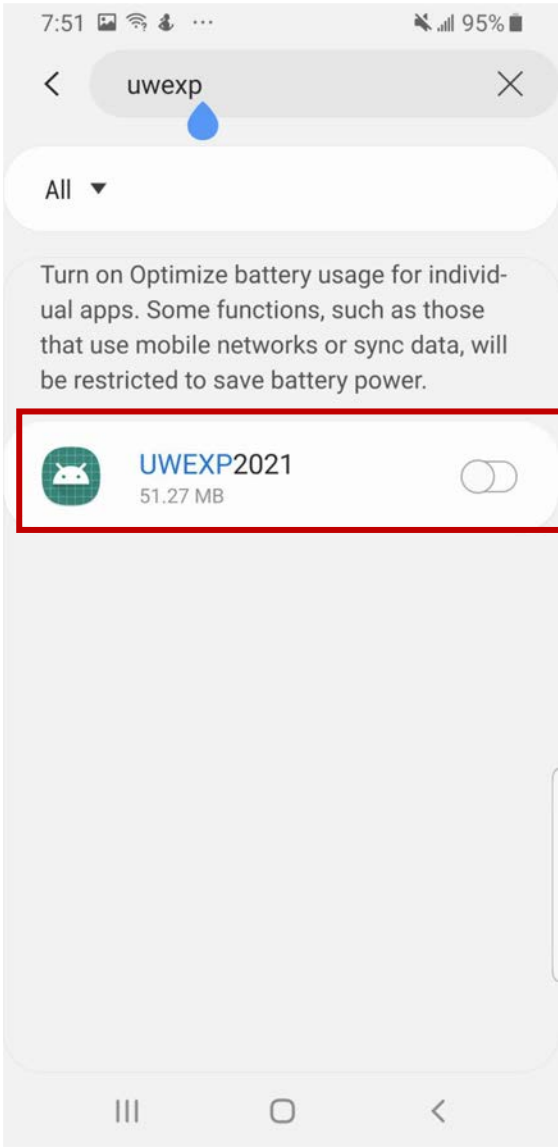



# Done!

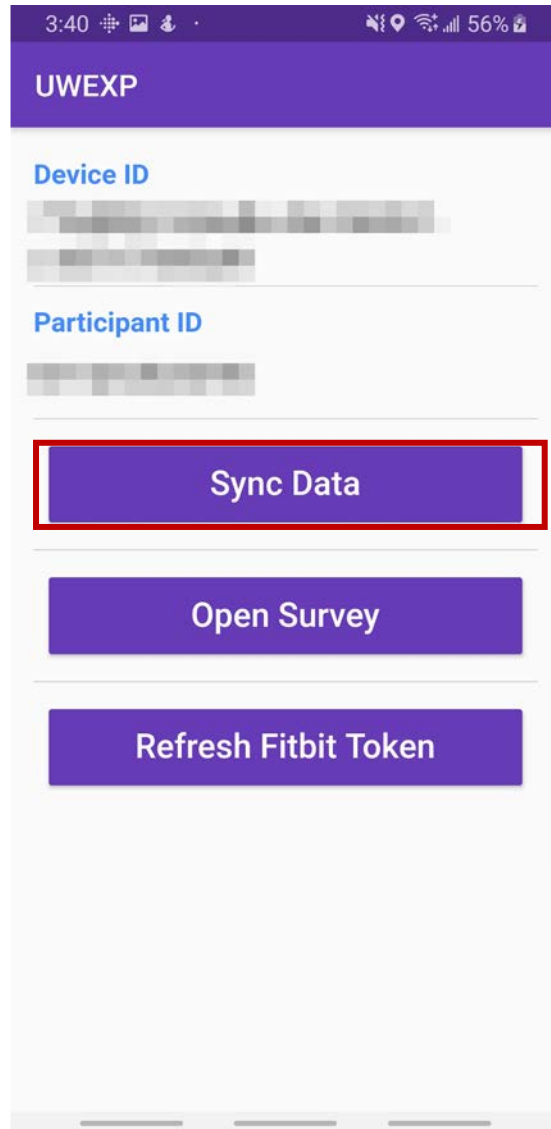

**Press Sync Data  
button to make  
sure your device is  
registered**

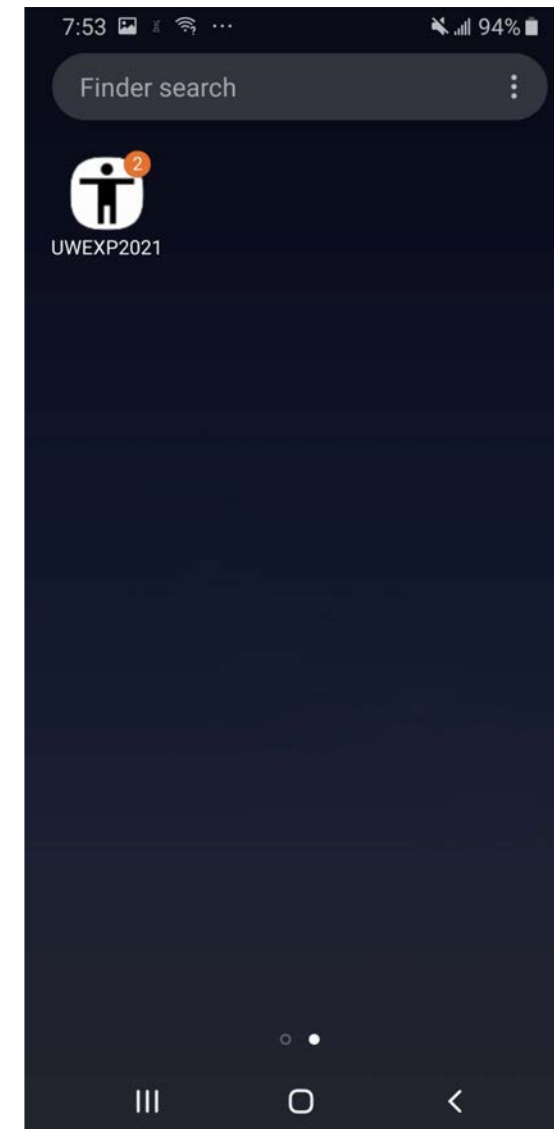

**All set!**

**Please make sure that both Fitbit and UWEXP are active in the background!**

**Please avoid low-power mode as much as possible!**

**If you accidentally kill them, that's fine.  
Just go ahead and relaunch it.**

**UWEXP – Answer a survey**

**Android**

# Answer a survey through a notification

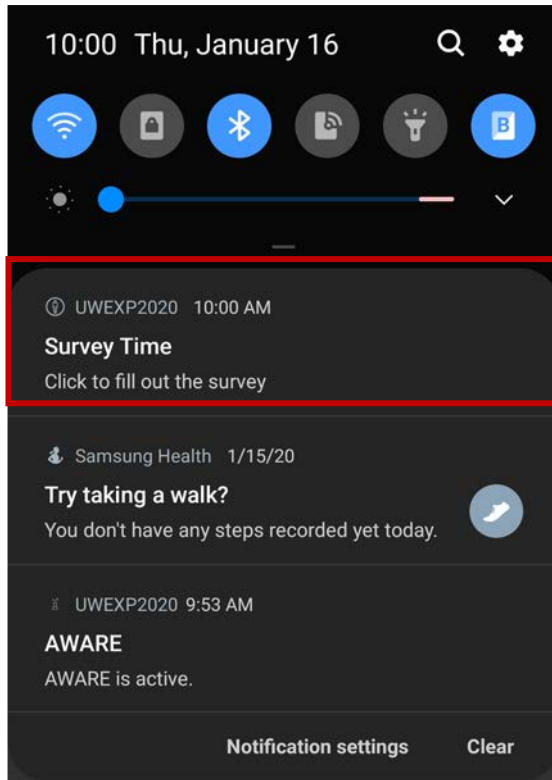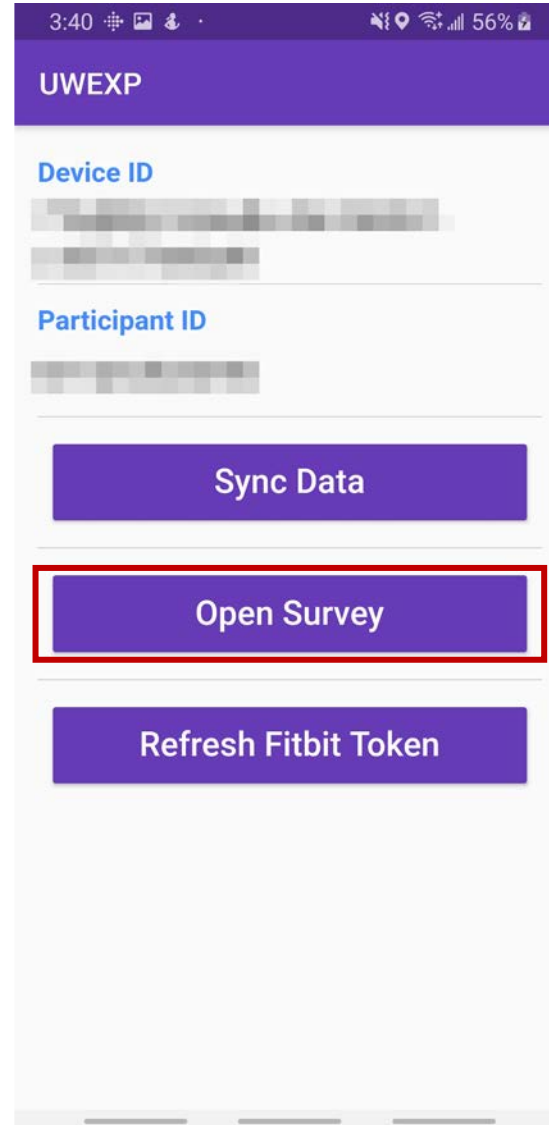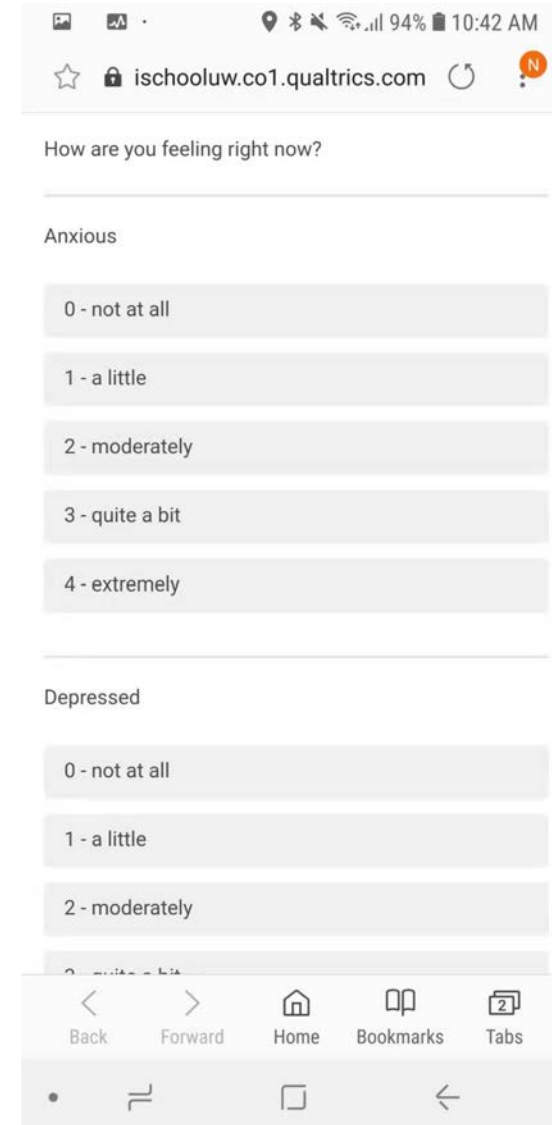

Scroll down and answer the survey

If you do not answer the survey, it will keep sending notification **every 60 mins.**

If you do not fill out it **in 12 hours (bi-weekly survey)/ 2 hours (quad-daily survey)**, the survey will **expire.**

# Answer a survey through a button

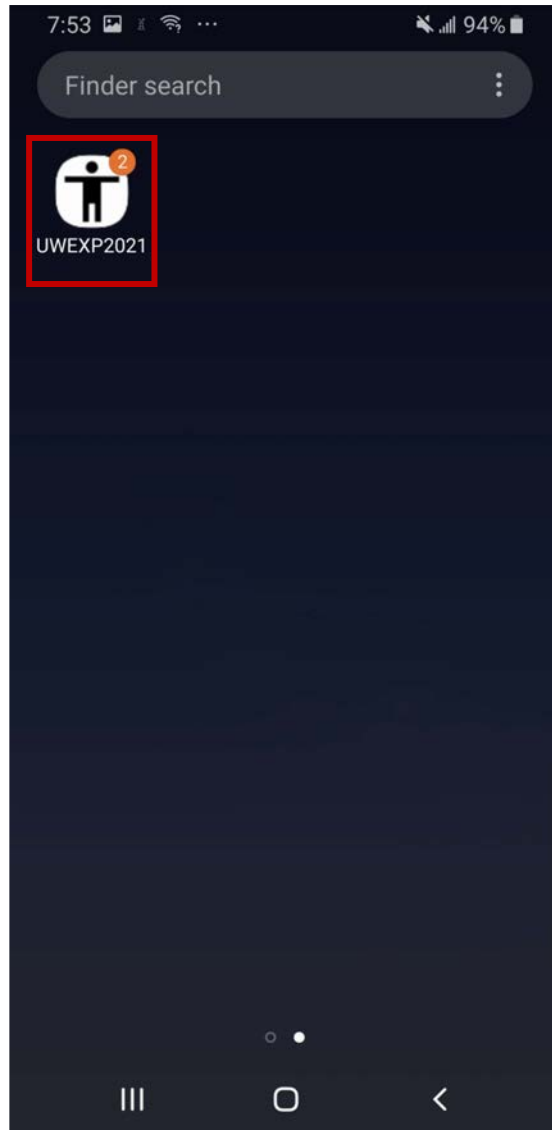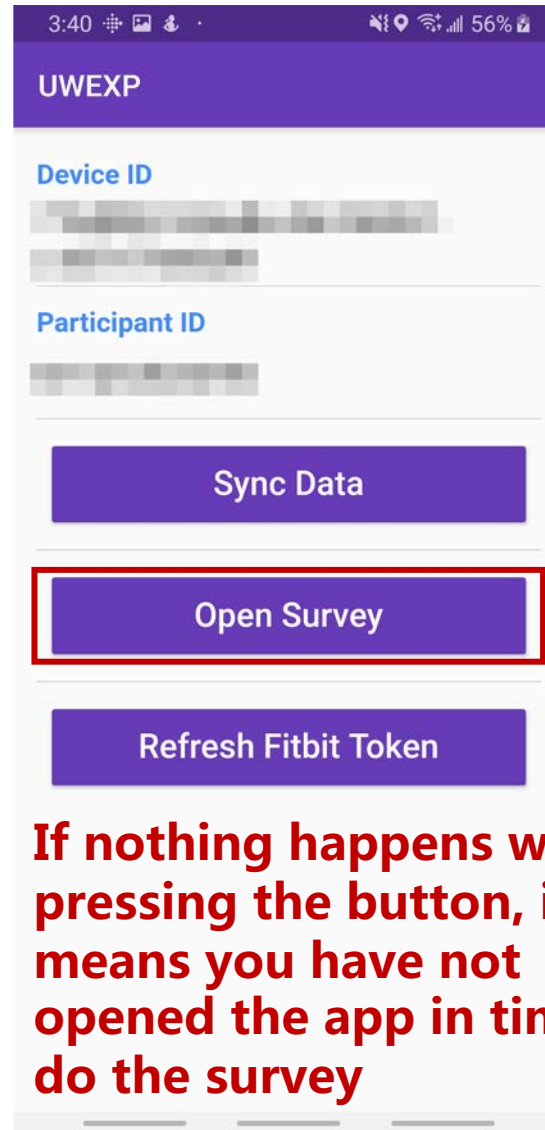

**If nothing happens when pressing the button, it means you have not opened the app in time to do the survey**

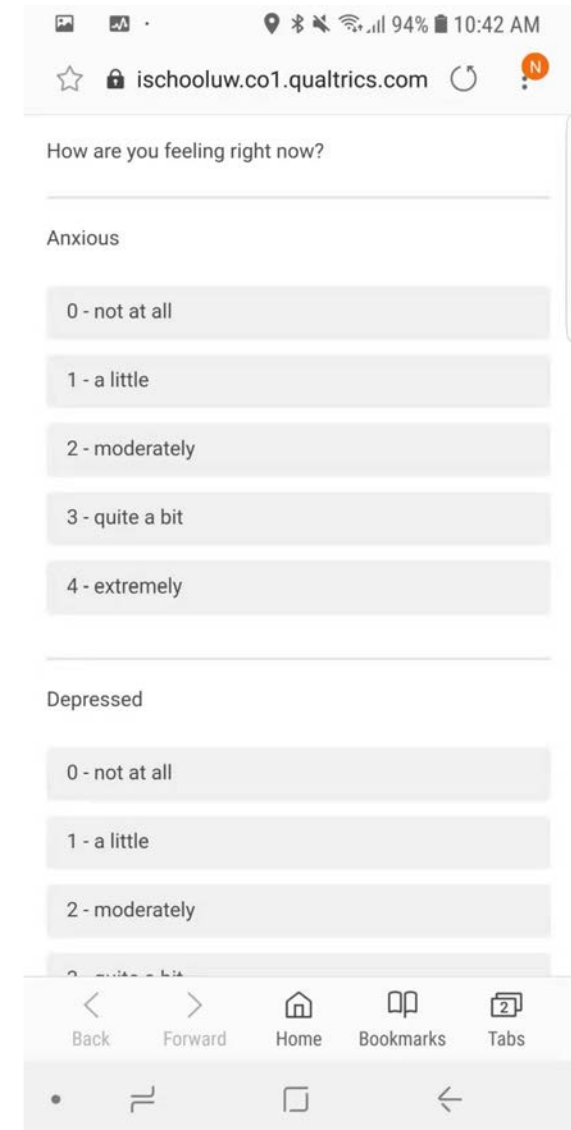

# **UWEXP – Manual Data Upload (ideally not needed)**

## **Android**

# Manually upload data

There are chances that UWEXP staff will reach out to you to ask you to “manually upload data” . And this is all what you need to do:

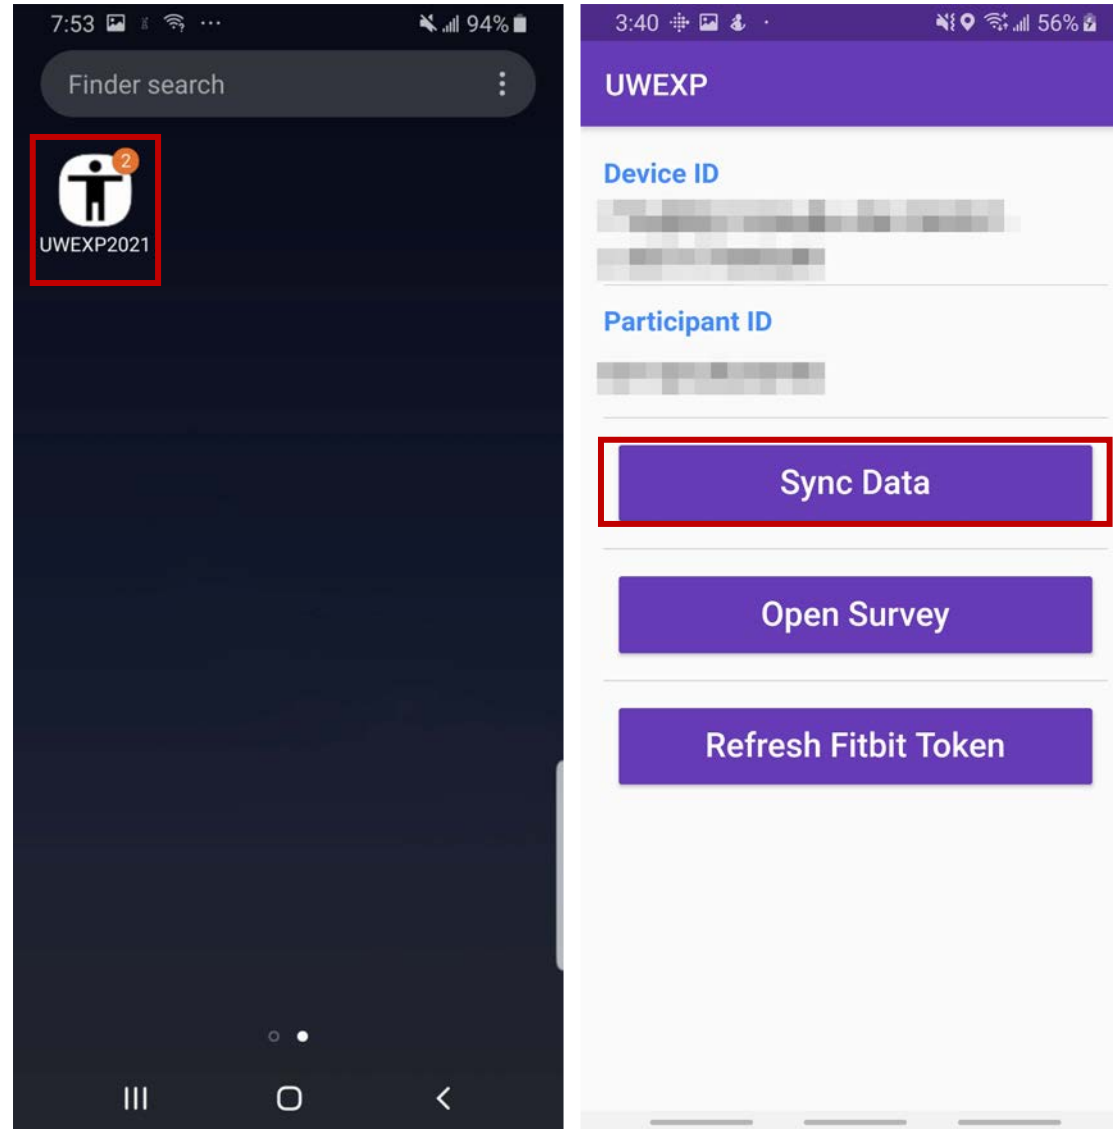

Before you press the button, please make sure that your phone is connected to WiFi and being charged.

# **UWEXP Re-Installation Instruction**

## **Android**

**We apologize that due to a technical issue we have to ask you to uninstall and reinstall the UWEXP 2021 app to ensure data collection. Here are the instructions.**



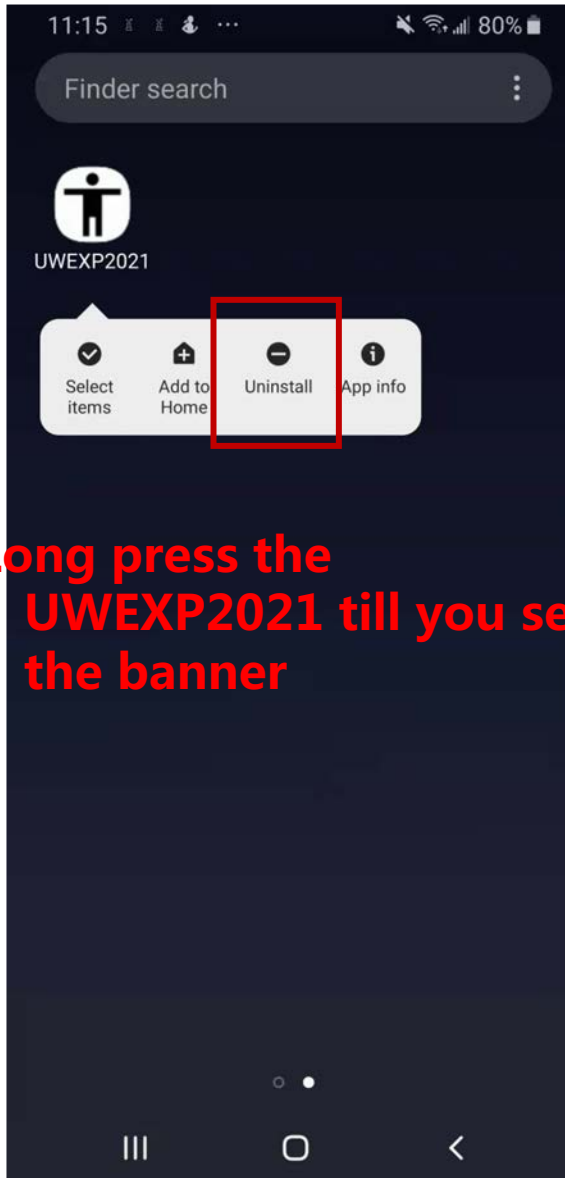

**Long press the  
UWEXP2021 till you see  
the banner**

# **UWEXP – Manual Data Upload**

## **Android**

# Force Quit and Relaunch the app

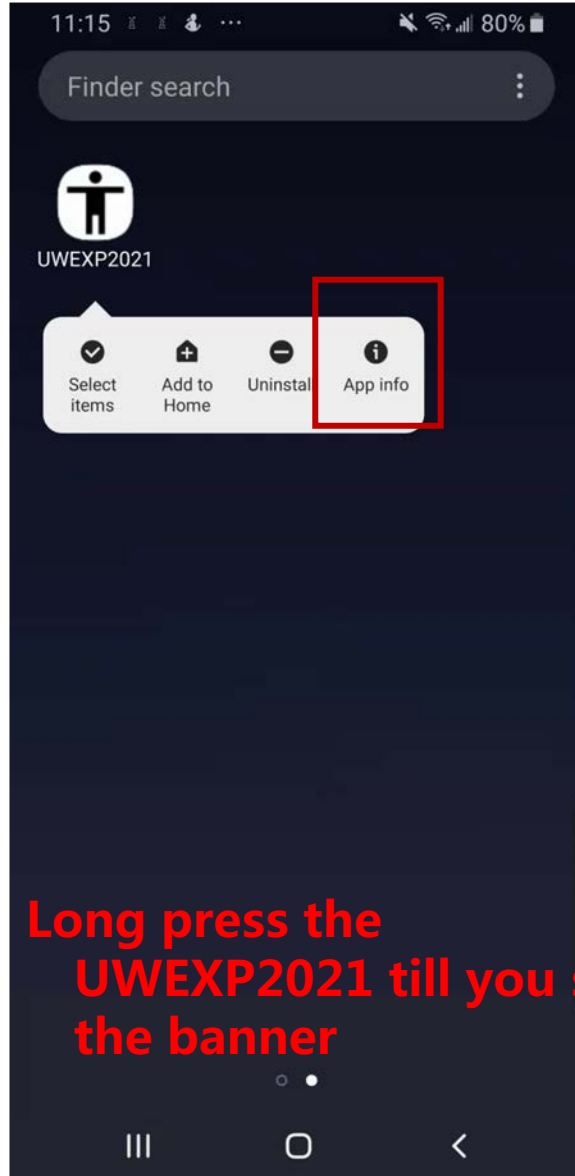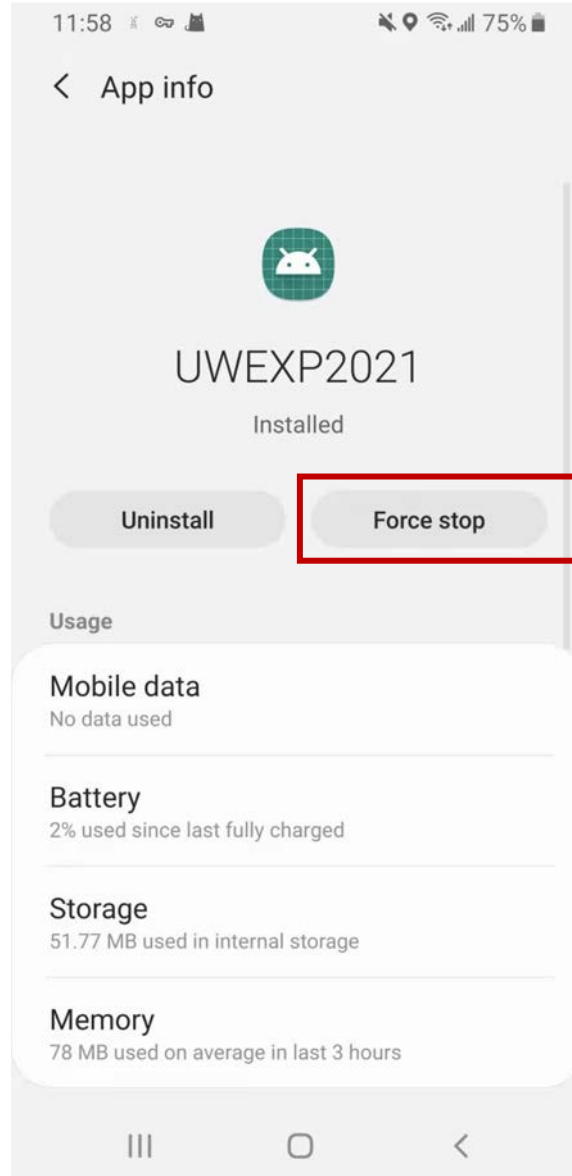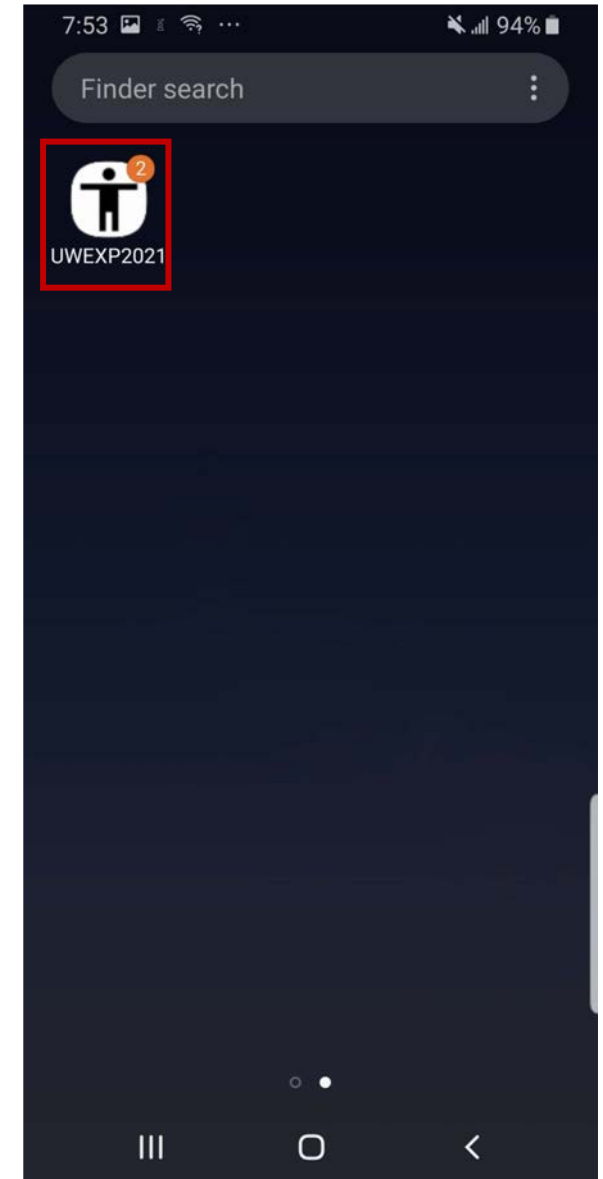

Supplement: supplementary_material [file attachment]
