# Supplementary material
Source: ML conference proceedings conference paper supplement (https://openreview.net/forum?id=GKOa7yNH8Uh)
Supplement: supplementary_material [file attachment]

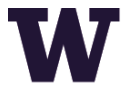

## IRB APPROVAL OF APPLICATION

December 7, 2017

Jennifer Carolyn Mankoff  
jmankoff@uw.edu

Dear Dr. Mankoff:

On 11/21/2017, University of Washington IRB Committee B reviewed the following application:

|                   |                                 |
|-------------------|---------------------------------|
| Type of Review:   | Initial Study                   |
| Title of Study:   | Student Stress on the UW Campus |
| Investigator:     | Jennifer Carolyn Mankoff        |
| IRB ID:           | STUDY00003244                   |
| Funding:          | None                            |
| IND, IDE, or HDE: | None                            |

### IRB Approval

Under FWA #00006878, the IRB approved your activity from 11/21/2017 to 11/20/2018.

- This approval applies only to the activities described in your application.
- This approval is for the number of subjects described in your application. Submit a Modification activity to request an increase in the number of approved subjects, if necessary.

### Determinations, waivers, and regulations

The IRB made the determinations and waivers listed in the table below.

| Requirement                  | Determination or Waiver                                                                                                              |
|------------------------------|--------------------------------------------------------------------------------------------------------------------------------------|
| Consent                      | -Waived for screening student records during recruitment<br>-Waived for third party subjects whose phone numbers are being collected |
| Required elements of consent | Screening Questionnaire - Waived: duration, risks, confidentiality, HSD contact, voluntary, no penalty or loss of benefits           |
| Documentation of consent     | Waived for screening questionnaire during recruitment                                                                                |

### Location of documents

4333 Brooklyn Ave. NE, Box 359470 Seattle, WA 98195-9470

main 206.543.0098 fax 206.543.9218 hsdinfo@u.washington.edu [www.washington.edu/research/hsd](http://www.washington.edu/research/hsd)

Implemented 10/17/2017 – Version 1.5 - Page 1 of 2

Use the consent form that was approved and stamped by the IRB. It can be downloaded from the **Documents tab** in Zipline.

Thank you for your commitment to ethical and responsible research. We wish you great success!

Sincerely,

Jennifer McBride  
Review Administrator  
[mcbride@uw.edu](mailto:mcbride@uw.edu)  
206-221-7862

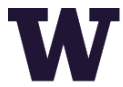

## IRB CONTINUING REVIEW APPROVAL

October 9, 2018

Dear Jennifer Carolyn Mankoff:

On 10/9/2018, University of Washington IRB Committee B reviewed the following application:

|                   |                                 |
|-------------------|---------------------------------|
| Type of Review:   | Continuing Review               |
| Title of Study:   | Student Stress on the UW Campus |
| Investigator:     | Jennifer Carolyn Mankoff        |
| STUDY ID          | STUDY00003244                   |
| CR ID:            | CR00001035                      |
| Funding:          | None                            |
| IND, IDE, or HDE: | None                            |

### **IRB Approval**

Under FWA #00006878, the IRB renewed approval for your activity from **10/9/2018 to 10/8/2019**.

- This approval is for the number of subjects described in your application. Submit a Modification activity to request an increase in the number of approved subjects, if necessary.

Thank you for your commitment to ethical and responsible research. We wish you great success!

Sincerely,

Rachel Thomas

Human Subjects Review Administrator, Committee B  
206-685-9379  
Rthomas2@uw.edu

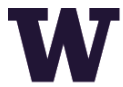

## IRB APPROVAL OF APPLICATION

October 1, 2019

Dear Jennifer Carolyn Mankoff:

On 9/24/2019, University of Washington IRB Committee B reviewed the following application:

|                   |                                                                                                                                                                               |
|-------------------|-------------------------------------------------------------------------------------------------------------------------------------------------------------------------------|
| Type of Review:   | Modification and Continuing Review                                                                                                                                            |
| Title of Study:   | Student Stress on the UW Campus: RAPID: Assessing the impact of Harassment and other Negative Events on Inclusion of Undergraduate Students in STEM (NSF Proposal ID 1941537) |
| Investigator:     | Jennifer Carolyn Mankoff                                                                                                                                                      |
| IRB ID:           | MODCR00000245                                                                                                                                                                 |
| Funding:          | Name: National Science Foundation (NSF), Grant Office ID: A147007, Funding Source ID: 1941537                                                                                 |
| IND, IDE, or HDE: | None                                                                                                                                                                          |

The modifications required to secure approval were reviewed and the application fully approved on 10/1/2019.

### **IRB Approval**

Under FWA #00006878, the IRB approved your activity from 9/24/2019 to 9/23/2020.

- **Depending on the nature of your study, you may need to obtain other approvals or permissions to conduct your research. For example, you might need to apply for access to data or specimens (e.g., to obtain UW student data). Or, you might need to obtain permission from facilities managers to approach possible subjects or conduct research procedures in the facilities (e.g., Seattle School District; the Harborview Emergency Department).**
- This approval applies only to the activities described in your application (including any references to specific grant sections). It does not include other activities that may be described in your grant or contract.
- This approval is for the number of subjects described in your application (in total and for each group). Submit a Modification to request an increase in the number of approved subjects, if necessary. Exceeding the IRB-approved number (**over-enrollment**) will be considered non-compliance.

### **Location of documents**

Use the consent forms that were approved and stamped by the IRB. They can be downloaded from the Final column under the **Documents tab** in Zipline.

4333 Brooklyn Ave. NE, Box 359470 Seattle, WA 98195-9470

main 206.543.0098 fax 206.543.9218 hsdinfo@u.washington.edu [www.washington.edu/research/hsd](http://www.washington.edu/research/hsd)

Thank you for your commitment to ethical and responsible research. We wish you great success!

Sincerely,

Shawn Query, CIP  
Review Administrator, Committee B  
[squery@uw.edu](mailto:squery@uw.edu)  
206.221.0265

**IRB CONTINUING REVIEW APPROVAL**

August 26, 2020

Dear Jennifer Carolyn Mankoff:

On 8/25/2020, University of Washington IRB Committee B reviewed the following application:

|                   |                                                                                                                                                                                                                                                                                                                                                                                                                                                                                                                                                                                                                                                                         |
|-------------------|-------------------------------------------------------------------------------------------------------------------------------------------------------------------------------------------------------------------------------------------------------------------------------------------------------------------------------------------------------------------------------------------------------------------------------------------------------------------------------------------------------------------------------------------------------------------------------------------------------------------------------------------------------------------------|
| Type of Review:   | Continuing Review                                                                                                                                                                                                                                                                                                                                                                                                                                                                                                                                                                                                                                                       |
| Title of Study:   | Student Stress on the UW Campus: RAPID: Assessing the impact of Harassment and other Negative Events on Inclusion of Undergraduate Students in STEM (NSF Proposal ID 1941537)                                                                                                                                                                                                                                                                                                                                                                                                                                                                                           |
| Investigator:     | Jennifer Carolyn Mankoff                                                                                                                                                                                                                                                                                                                                                                                                                                                                                                                                                                                                                                                |
| STUDY ID          | STUDY00003244                                                                                                                                                                                                                                                                                                                                                                                                                                                                                                                                                                                                                                                           |
| CR ID:            | CR00003486                                                                                                                                                                                                                                                                                                                                                                                                                                                                                                                                                                                                                                                              |
| Funding:          | Name: National Science Foundation (NSF), Grant Office ID: A147007, Funding Source ID: 1941537; Name: Samsung Electronics Company, Inc., Grant Office ID: A146753, Funding Source ID: FA174258PE; Name: National Science Foundation (NSF), Grant Office ID: A145174, Funding Source ID: 2009977<br><br>Funding Title: "Passively Collected Longitudinal Data for Detecting and Predicting Depression over Time, RAPID: Assessing the impact of Harassment and other Negative Events on Inclusion of Undergraduate Students in STEM, Using Passive Sensing to Assess the Impact of Real-Time Discrimination against Women and Underrepresented Minorities in Engineering" |
| IND, IDE, or HDE: | None                                                                                                                                                                                                                                                                                                                                                                                                                                                                                                                                                                                                                                                                    |

**IRB Approval**

Under FWA #00006878, the IRB **renewed approval for your activity from 8/25/2020 to 8/24/2021.**

- COVID NOTE: Researchers must comply with current infection control requirements and complete a self-assessment that activities fit within allowable research as described on the [HSD website](https://www.washington.edu/research/hsd).
- This approval applies only to the activities described in your application (including any references to specific grant sections). It does not include other activities that may be described in your grant or contract.

- This approval is for the number of subjects described in your application (in total and for each group). Submit a Modification to request an increase in the number of approved subjects, if necessary. Exceeding the IRB-approved number ([over-enrollment](#)) will be considered non-compliance.

Thank you for your commitment to ethical and responsible research. We wish you continued success!

Sincerely,

Deborah Dickstein, MSPH  
Human Subjects Review Administrator, Team B  
206-543-5971 [dickstei@uw.edu](mailto:dickstei@uw.edu)
