# Supplementary material
Source: ML conference proceedings conference paper supplement (https://openreview.net/forum?id=GKOa7yNH8Uh)
Supplement: supplementary_material [file attachment]

## **UW Student Experience: Phase I Compensation Structure**

**Baseline 1 Session & First Questionnaire = \$20**

### **Surveys on your smartphone:**

- **Weekly Surveys:**
  - 16-18 (85-100%) surveys completed = \$20
  - 12-16 (65-84%) surveys completed = \$10
  - 0-12 (0-64%) surveys completed = \$5
- **EMA WEEK 1:**
  - 24-28 (85-100%) surveys completed = \$20
  - 19-23 (65-84%) surveys completed = \$10
  - 0-18 (0-64%) surveys completed = \$5
- **EMA WEEK 2:**
  - 24-28 (85-100%) surveys completed = \$20
  - 19-23 (65-84%) surveys completed = \$10
  - 0-18 (0-64%) surveys completed = \$5

**Between Quarter Questionnaire = \$20**

- **Weekly Surveys:**
  - 16-18 (85-100%) surveys completed = \$20
  - 12-16 (65-84%) surveys completed = \$10
  - 0-12 (0-64%) surveys completed = \$5
- **EMA WEEK 3:**
  - 24-28 (85-100%) surveys completed = \$30
  - 19-23 (65-84%) surveys completed = \$20
  - 0-18 (0-64%) surveys completed = \$10
- **EMA WEEK 4:**
  - 24-28 (85-100%) surveys completed = \$40
  - 19-23 (65-84%) surveys completed = \$30
  - 0-18 (0-64%) surveys completed = \$20

**Bonuses + Technology Use:**

- \$25 for completing over 90% of surveys across all 3 weeks
- You get to keep the Fitbit ***IF*** you wear a charged Fitbit for over 90% of days throughout the Spring semester

**Post Questionnaire = \$30**

**TOTAL COMPENSATION UP TO = \$245 + Fitbit**

***If you have any questions please contact Woosuk at seow@uw.edu***

## **UW Student Experience: Phase II Compensation Structure**

**Baseline 1 Session & First Questionnaire = \$10**

**Baseline 2 Questionnaire = \$10**

**Total = \$20**

**If a participant does not complete the baseline/long questionnaires, there will be no compensation for EMAs and Fitbit/AWARE app use.**

### **Surveys on your smartphone:**

- Weekly Surveys (light week surveys):
  - \$20 for completing over 85% (17-20) of surveys
  - \$10 for completing between 50-85% (10-17) of surveys
  - \$ 5 for completing between 25-50% (5-10) of surveys
  - \$ 0 for completing between 0-25% (0-5) of surveys
- EMA WEEK 1(January 21st-27th):
  - 24-28 (86-100%) surveys completed = \$15
  - 19-23 (68-82%) surveys completed = \$10
  - 10-18 (36-64%) surveys completed = \$5
  - 0-9 (0-32%) surveys completed = \$0
- EMA WEEK 2(February 25th – March 3rd):
  - 24-28 (86-100%) surveys completed = \$20
  - 19-23 (68-82%) surveys completed = \$10
  - 10-18 (36-64%) surveys completed = \$5
  - 0-9 (0-32%) surveys completed = \$0

**Final Survey(post questionnaire) = \$20 if completed on time AND allows you to earn BONUSES.**

**Bonuses + Technology Use:**

- You get to keep the Fitbit **IF** you wear a charged Fitbit for over 90% of days throughout the Spring semester
- You get \$10 **IF** you upload the AWARE data for over 90% of days throughout the Winter quarter
- \$10 for completing over 90% of all EMA surveys and light surveys across the quarter.

**Warnings:**

By the time the application is installed, you need to approve the permissions for the application to get access to these information. Otherwise the installation will fail. (Note: Revoke of the permissions will cause system halted. Deliberate revoke will be regarded as non-participation.

It may or may not happen that we will release new application version during the study. You will receive a notification/email about this. It is your responsibility to keep the application updated. Deliberately ignoring the message and using the outdated version will be regarded as non-participation.

**TOTAL COMPENSATION UP TO = \$115 + Fitbit**

***If you have any questions please contact us at uw-exp@uw.edu***

## **UW Student Experience: Phase III Compensation Structure (per year)**

**Baseline 1 Session & First Questionnaire = \$10**

**Baseline 2 Questionnaire = \$10**

**Total = \$20**

**If a participant does not complete the baseline/long questionnaires, there will be no compensation for EMAs and Fitbit/Smartwatch/AWARE app use.**

### **Surveys on your smartphone:**

- Weekly Surveys (light week surveys):
  - \$20 for completing 85% or more (17-20) of surveys
  - \$10 for completing between 50-84% (10-16) of surveys
  - \$ 5 for completing between 25-49% (5-9) of surveys
  - \$ 0 for completing less than 25% (0-5) of surveys
  
- EMA WEEK 1:
  - 24-28 (86-100%) surveys completed = \$15
  - 19-23 (68-85%) surveys completed = \$10
  - 10-18 (36-67%) surveys completed = \$5
  - 0-9 (0-35%) surveys completed = \$0
  
- EMA WEEK 2:
  - 24-28 (86-100%) surveys completed = \$20
  - 19-23 (68-85%) surveys completed = \$10
  - 10-18 (36-67%) surveys completed = \$5
  - 0-9 (0-35%) surveys completed = \$0

**Final Survey (post questionnaire) = \$20 if completed on time AND allows you to earn BONUSES.**

**Bonuses + Technology Use:**

- You get to keep the Fitbit or Samsung smartwatch **IF** you wear the charged device for over 90% of days throughout the Spring quarter. You are expected to use the same device in each year you are in the study (i.e. we will not provide a new one each year)
- You get \$10 **IF** you upload the AWARE data for over 90% of days throughout the Spring quarter
- \$10 for completing over 90% of all EMA surveys and light surveys across the quarter.
- Returning participant bonus: \$50 your second year, \$75 your third year, \$100 your fourth year. Bonus will be included in final study payment.

**Warnings:**

By the time the application is installed, you need to approve the permissions for the application to get access to this information. Otherwise the installation will fail. (Note: Revoke of the permissions will cause the system to halt. Deliberate revoke will be regarded as non-participation.)

We may or may not release a new application version during the study. You will receive a notification/email about this. It is your responsibility to keep the application updated. Deliberately ignoring the message and using the outdated version will be regarded as non-participation.

**TOTAL COMPENSATION UP TO \$115 the first year, \$165 the second year, \$190 the third year, \$215 the fourth year + one wrist-worn smart device (over the course of the study)**

***If you have any questions please contact us at [uw-exp@uw.edu](mailto:uw-exp@uw.edu)***

## **UW Student Experience: Phase IV Compensation Structure (per year)**

**Baseline 1 Session & First Questionnaire = \$10**

**Baseline 2 Questionnaire = \$10**

**If a participant does not complete the baseline/long questionnaires, there will be no compensation for EMAs and Fitbit/AWARE app use.**

### **Surveys on your smartphone:**

- Twice-Weekly EMA Surveys (light week surveys):
  - \$20 for completing 85% or more (17-20) of surveys
  - \$10 for completing between 50-84% (10-16) of surveys
  - \$ 5 for completing between 25-49% (5-9) of surveys
  - \$ 0 for completing less than 25% (0-5) of surveys
  
- EMA Intense week 1 (April 18-24):
  - 24-28 (86-100%) surveys completed = \$15
  - 19-23 (68-85%) surveys completed = \$10
  - 10-18 (36-67%) surveys completed = \$5
  - 0-9 (0-35%) surveys completed = \$0
  
- EMA Intense week 2 (May 16-22):
  - 24-28 (86-100%) surveys completed = \$20
  - 19-23 (68-85%) surveys completed = \$10
  - 10-18 (36-67%) surveys completed = \$5
  - 0-9 (0-35%) surveys completed = \$0

**Final Survey (post questionnaire) = \$20 if completed on time AND allows you to earn BONUSES.**

### **Bonuses + Technology Use:**

- You get to keep the Fitbit **IF** you wear the charged device for over 90% of days throughout the Spring quarter. You are expected to use the same device in each year you are in the study (i.e. we will not provide a new one each year)
- You get \$10 **IF** you upload the AWARE data for over 90% of days throughout the Spring quarter
- \$10 for completing over 90% of all EMA surveys and across the quarter.
- **Returning participant bonus:** \$50 your second year, \$75 your third year, \$100 your fourth year.
- Bonuses will be included in final study payment.

### **Warnings:**

By the time the application is installed, you need to approve the permissions for the application to get access to this information. Otherwise the installation will fail. (Note: Revoke of the permissions will cause the system to halt. Deliberate revoke will be regarded as non-participation.)

We may or may not release a new application version during the study. You will receive a notification/email about this. It is your responsibility to keep the application updated. Deliberately ignoring the message and using the outdated version will be regarded as non-participation.

**TOTAL COMPENSATION UP TO \$115 the first year, \$165 the second year, \$190 the third year, \$215 the fourth year + one wrist-worn smart device (over the course of the study)**

***If you have any questions please contact us at uw-exp@uw.edu***
