# Supplementary material
Source: ML conference proceedings conference paper supplement (https://openreview.net/forum?id=GKOa7yNH8Uh)
Supplement: supplementary_material [file attachment]

---

# [NeurIPS 2022 Dataset and Benchmark Track]

## Supplementary Materials README

---

This is the README file for the supplementary materials for the paper titled:

### **GLOBEM Dataset: Multi-Year Datasets for Longitudinal Human Behavior Modeling Generalization**

We provide a brief overview of all files in the supplementary folder. We highly recommend readers to watch the introductory video first, which provides a short summary of the content of our paper. The file `GLOBEM_full.pdf` contains the main paper and all appendices.

```
root
├── GLOBEM_full.pdf: Full paper with appendices
├── Video
│   ├── GLOBEM.mp4: Introductory video of the paper
│   └── caption.srt: Video caption
├── A - Additional Study Details: Section names are their positions in the paper
│   ├── A.1 - University IRB Approval Letter.pdf
│   ├── A.1 - Consent Form 2018-2021.pdf
│   ├── A.1 - Compensation Structure - 2018-2021.pdf
│   ├── A.1 - Participant Instruction - iOS version.pdf
│   ├── A.1 - Participant Instruction - Android version.pdf
│   └── A.4 - Survey Details.pdf: Specific questions in each survey
```
