# Supplementary material
Source: ML conference proceedings conference paper supplement (https://openreview.net/forum?id=GKOa7yNH8Uh)
Supplement: supplementary_material [file attachment]

# **UWEXP Installation Instruction**

**iOS**

# **UWEXP Installation Instruction**

**Fitbit**

# Join Fitbit

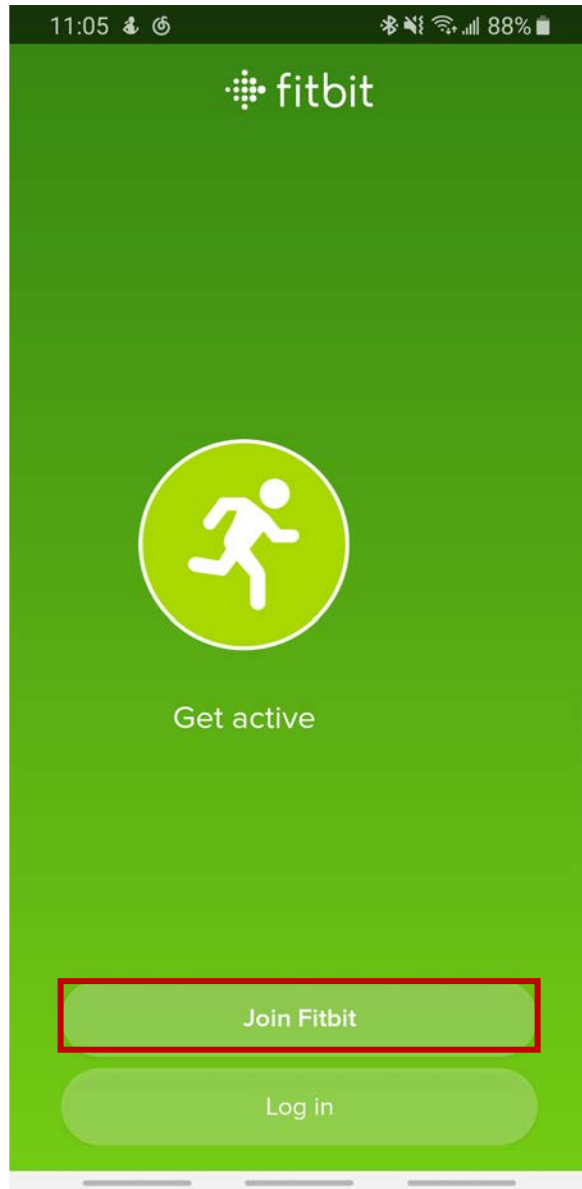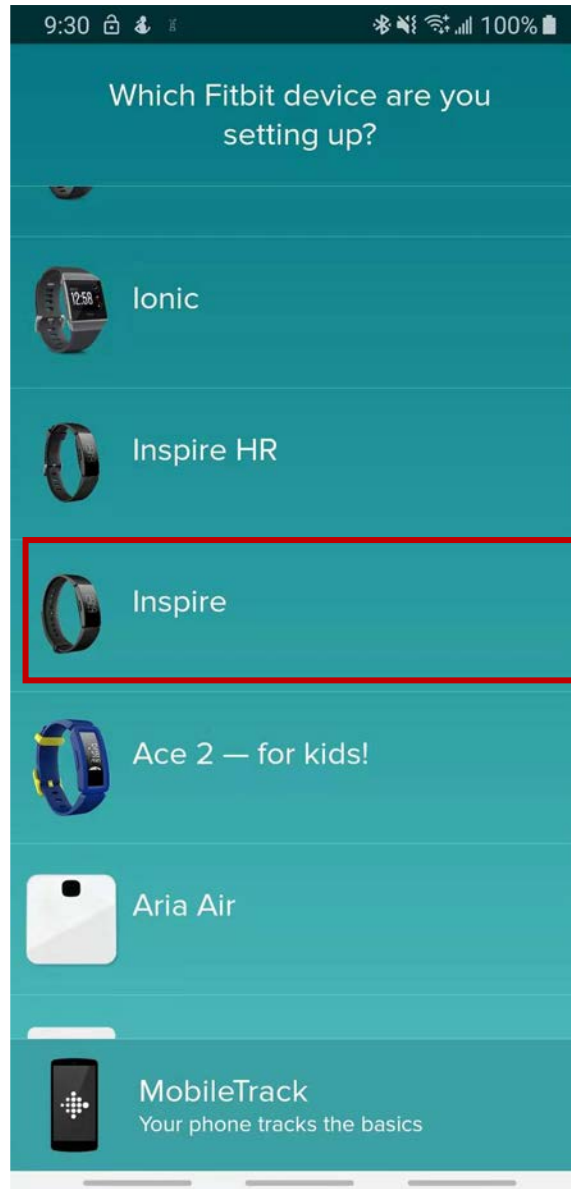

**Select the provided device. (Here using Inspire as an example) If using Flex2, choose it from the list. The remaining steps are similar.**

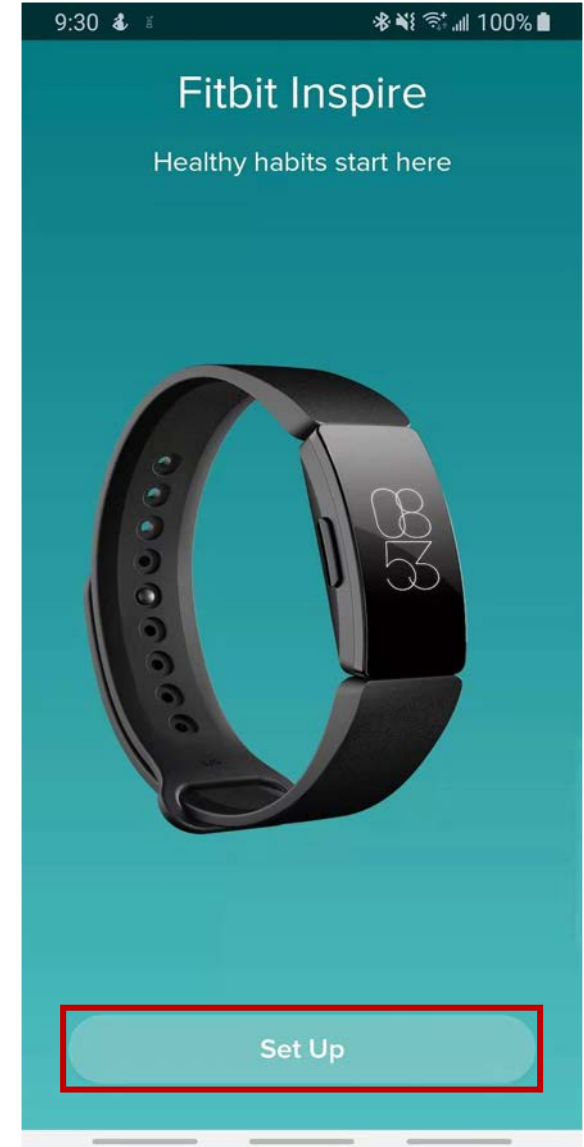

# Join Fitbit

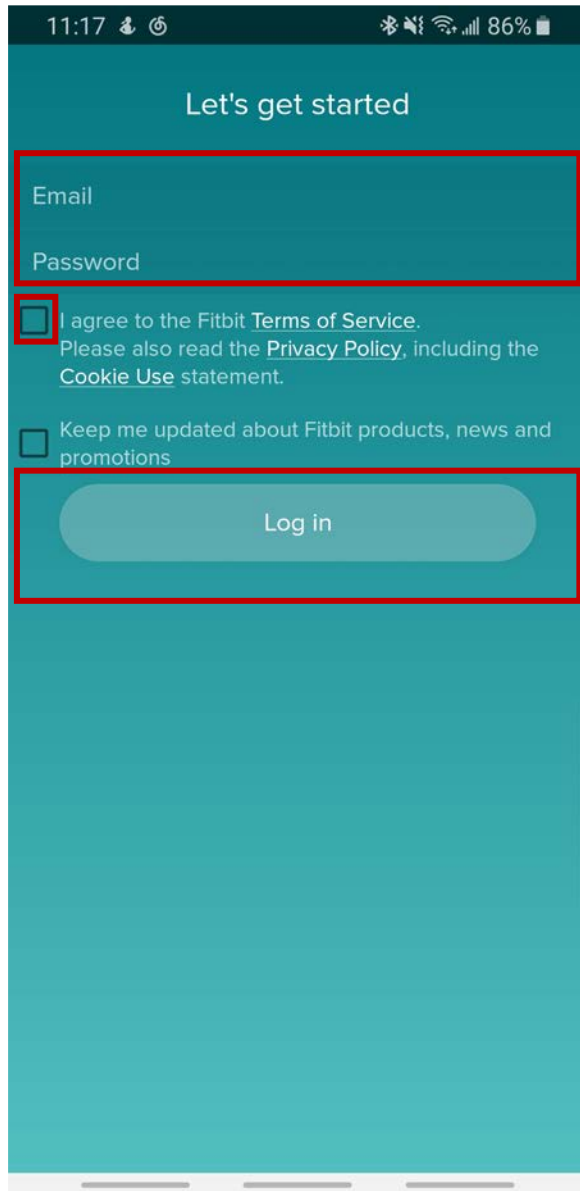

11:17 86%

Let's get started

Email

Password

☐ I agree to the Fitbit [Terms of Service](#). Please also read the [Privacy Policy](#), including the [Cookie Use](#) statement.

☐ Keep me updated about Fitbit products, news and promotions

Log in

**Enter the provided email address and the password. Read Fitbit Terms of Service and check the box**

**Then press Log in to Join Fitbit**

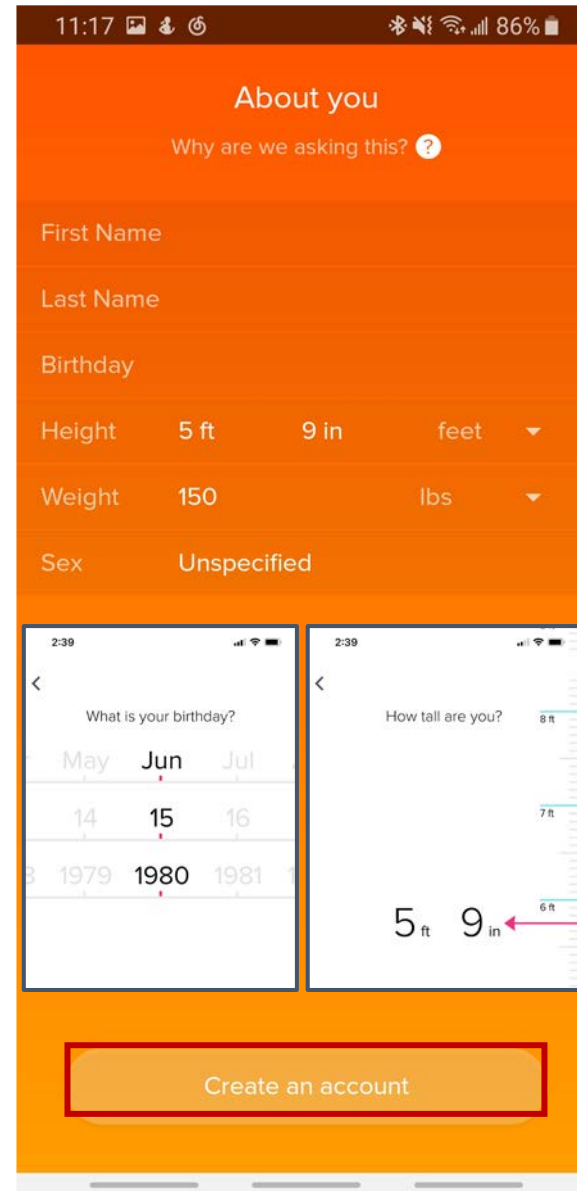

11:17 86%

About you

Why are we asking this? ?

First Name

Last Name

Birthday

Height 5 ft 9 in feet

Weight 150 lbs

Sex Unspecified

What is your birthday?

May Jun Jul

14 15 16

1979 1980 1981

How tall are you?

5 ft 9 in

Create an account

**Enter your data then press Create an account**

# Connect the Fitbit Device

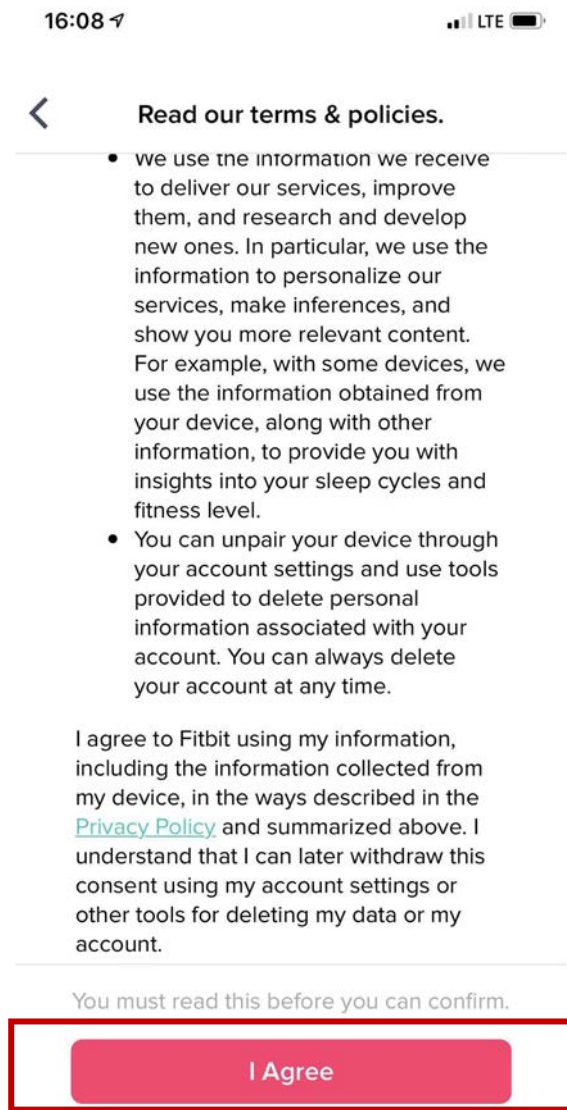

**Scroll to the end after reading**

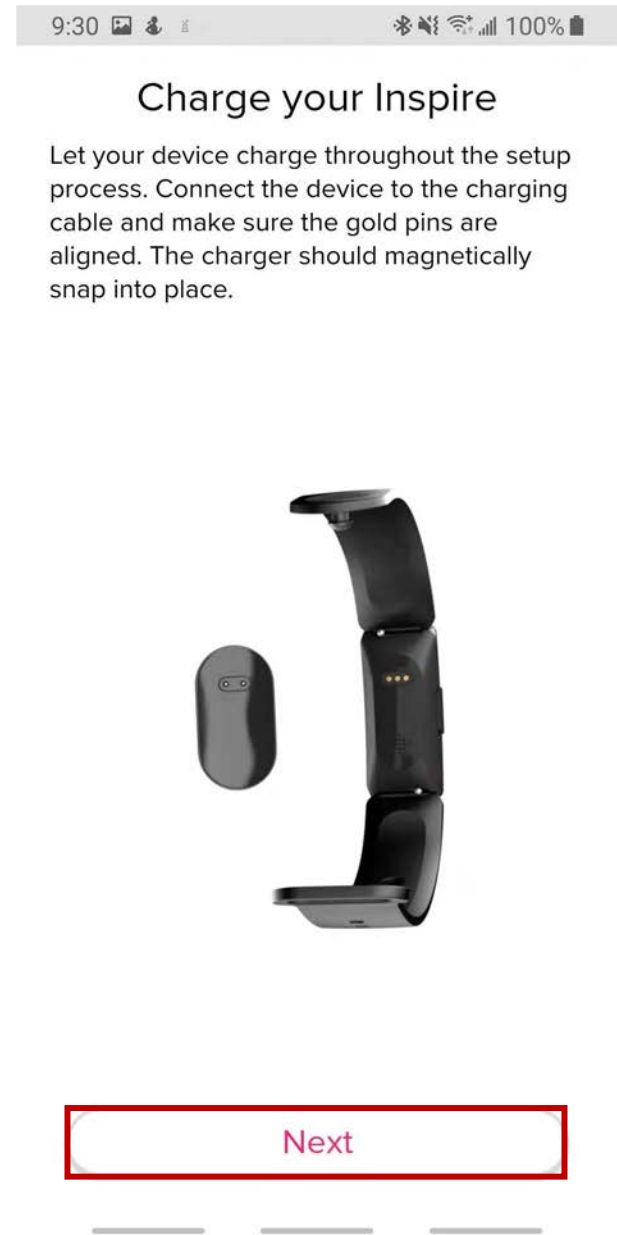

# Connect the Fitbit Device

9:30 AT&T

100%

## Power up

Plug the charging cable into a USB port.  
Connect it to your tracker and make sure the  
gold pins are aligned.

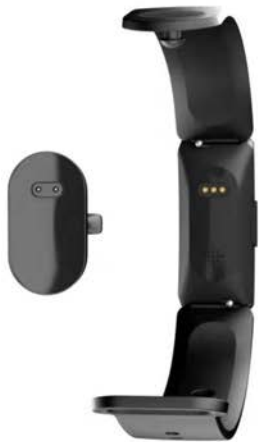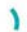

Searching

## Troubleshooting when connecting the Fitbit to the phone

- **Cannot find the device**
  - Quit the pairing and restart the pairing
  - If it did not work, go to somewhere **away from other active Fitbit devices** and restart pairing
  - If it did not work, **kill the Fitbit App at the background** and open it again, then restart pairing.
  - If not work, **turn off and turn on phone Bluetooth.** Next, restart the pairing
- Once found, it should be alright. But note that connecting the device may take several minutes

# Connect the Fitbit Device

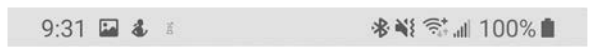

Enter the 4 digits on your device's display

[Not working?](#)

12

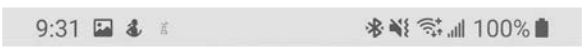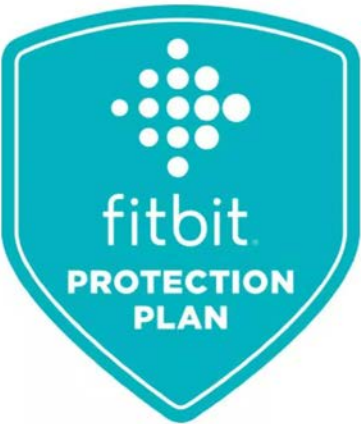

## Protect Your New Device

Covers damage from accidents like drop, spills, and cracked screens from day 1 and mechanical and electrical breakdowns after the Fitbit manufacturer warranty.

Powered by Square Trade

PURCHASE

NOT NOW

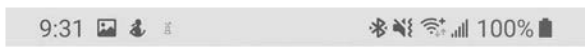

## Try it on.

It's the moment your wrist has been waiting for!.

Wear your device loosely enough to slide up and down your wrist.

During workouts, secure the band so that it lays flat, 2-3 finger-widths above your wrist bone.

## Put on the Fitbit sensor

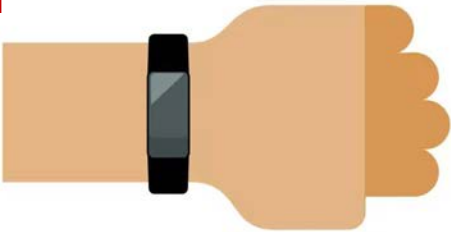

Next

# Connect the Fitbit Device

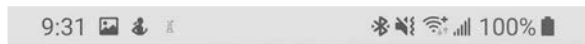

## Change out your band

Swap your band for larger sizes or a variety of stylish accessory options. Fitbit accessories are designed to work best with our products.

Insert the pin in the left hole first.

Keep the band at an upwards angle. Then slide the ball pin inwards while pushing the band into the slot.

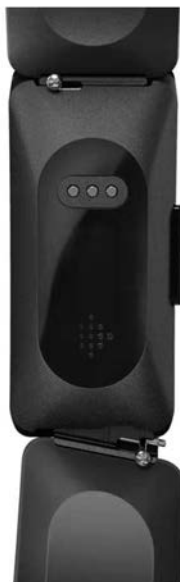

Next

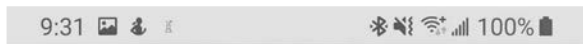

## Swipe up and down

Swipe up to reveal health stats and swipe down to show menu options

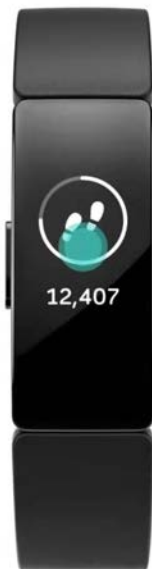

Next

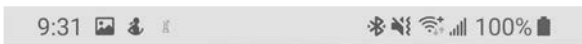

## Tap icon

Opens a feature

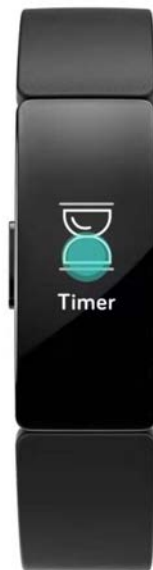

Next

Several Next



# Connect the Fitbit Device

9:31 100%

## Product care tips

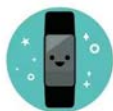

Clean your band and wrist regularly with a soap-free cleanser.

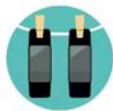

If your device gets wet, remove and dry it completely after your workout.

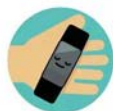

Take your band off from time to time. If your skin gets irritated, be sure to remove your tracker.

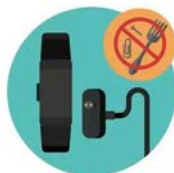

When charging the tracker, make sure there aren't any metal objects such as jewelry near the charger. Once you're done charging, unplug the charger.

Click [here](#) for more product care information.

Next

9:32 100%

## All set!

Now, get moving and make every moment count.

## Several Next

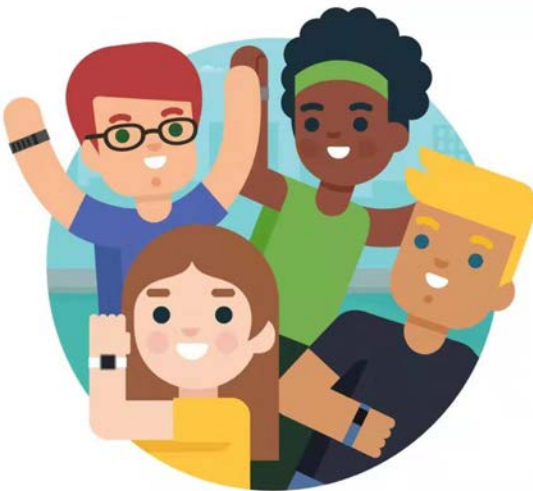

[Learn About Inspire](#)

Done

## All set!

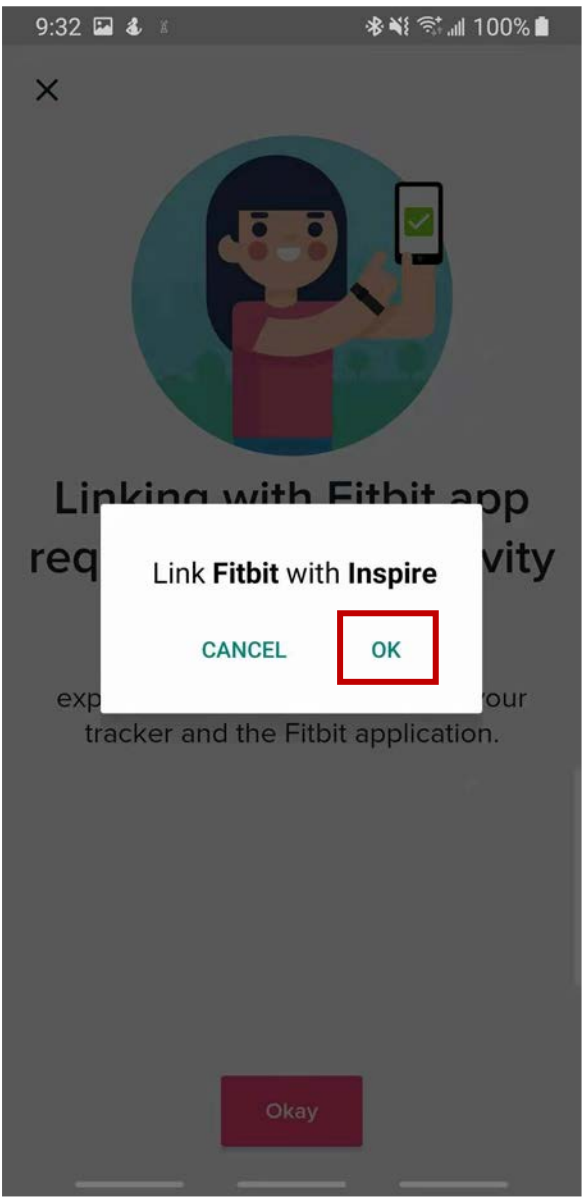

# Turn on the All-Day Sync

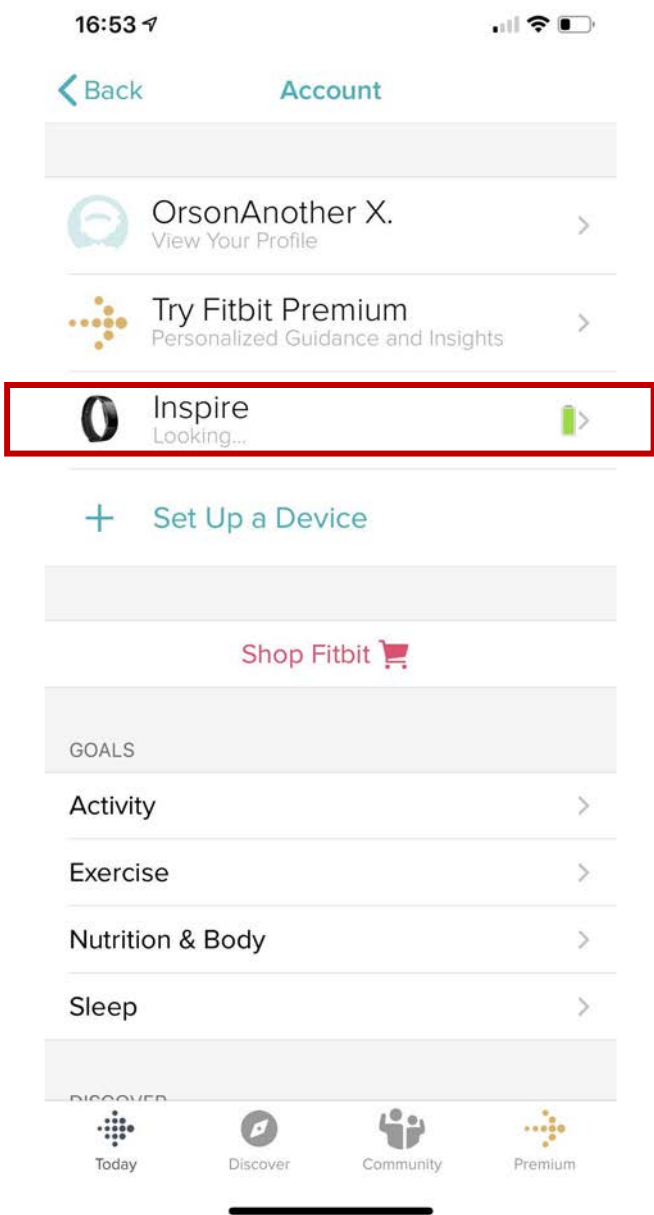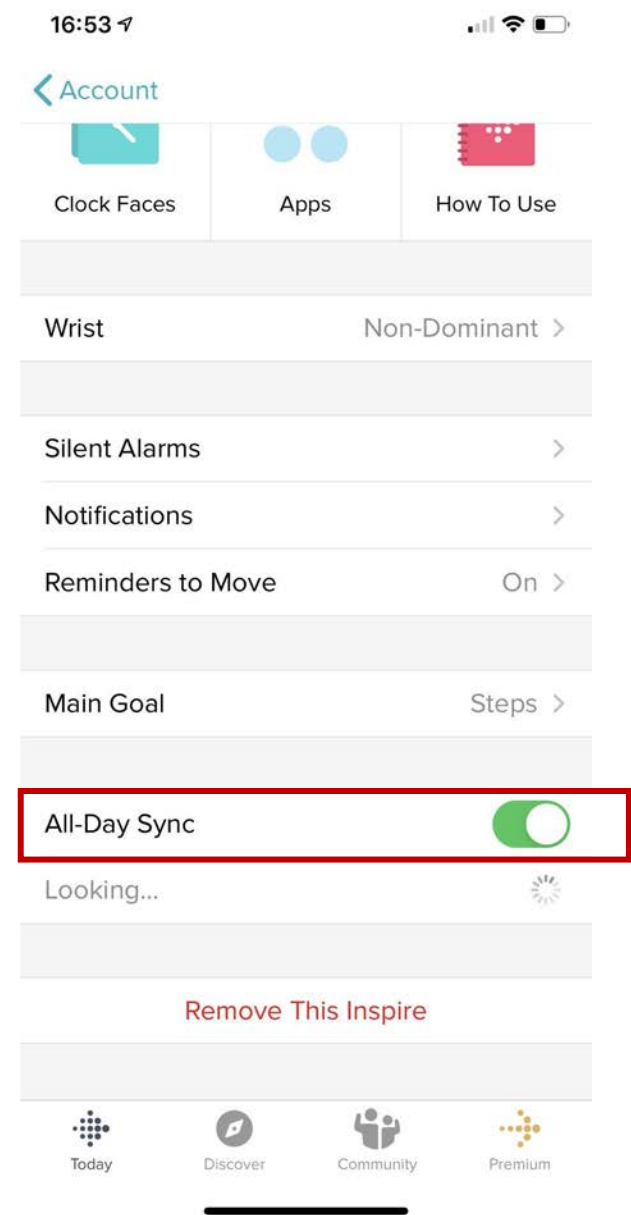

# **UWEXP Installation Instruction**

**iOS**

# Find and install UWEXP in App Store

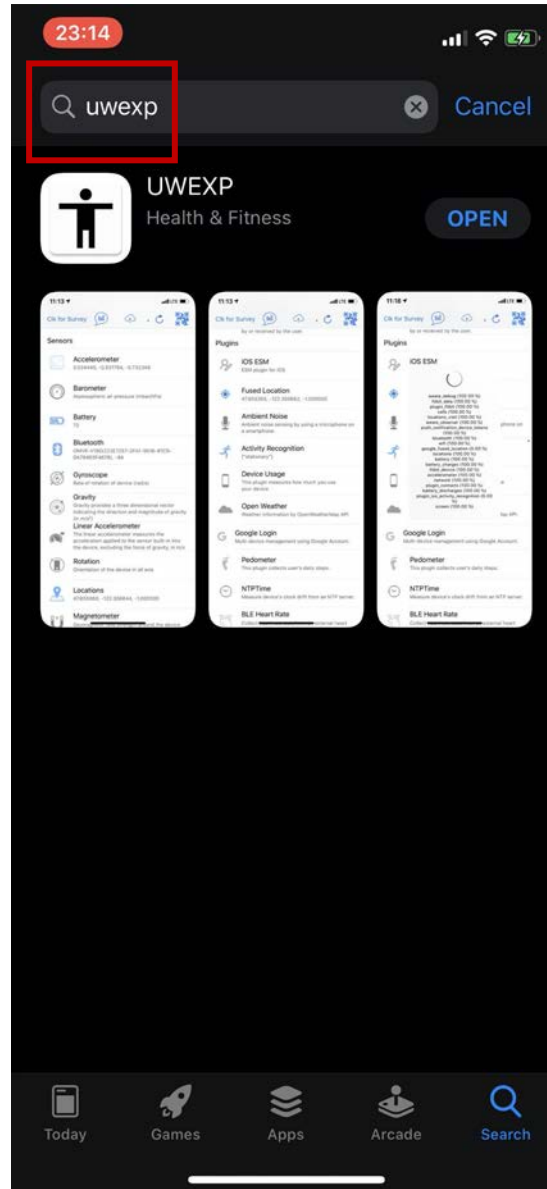

# Open the app and join the study – part 1

The image displays three sequential screenshots of a mobile application interface for 'UWEXP'. Each screenshot shows the same layout: a purple header with the time '2:53' and signal/battery icons; a 'Device ID' field with the value 'b5ca82ac-f7f6-4b88-8180-4661785bf242'; a 'Participant ID' field; and three buttons: 'Save', 'Open Survey', and 'Refresh Fitbit Token'.

- First Screenshot:** The 'Participant ID' field contains the placeholder text 'Enter your participant id here'. A red rectangle highlights this field.
- Second Screenshot:** The 'Participant ID' field now contains a 4-digit purple box. A red rectangle highlights the 'Save' button.
- Third Screenshot:** The 'Save' button is no longer visible. The 'Sync Data' button has appeared. A grey toast message at the bottom reads 'Saved Participant ID Successfully!'.

**Enter 4-digits  
Participant ID  
then Press Save**

# Open the app and join the study – part 2

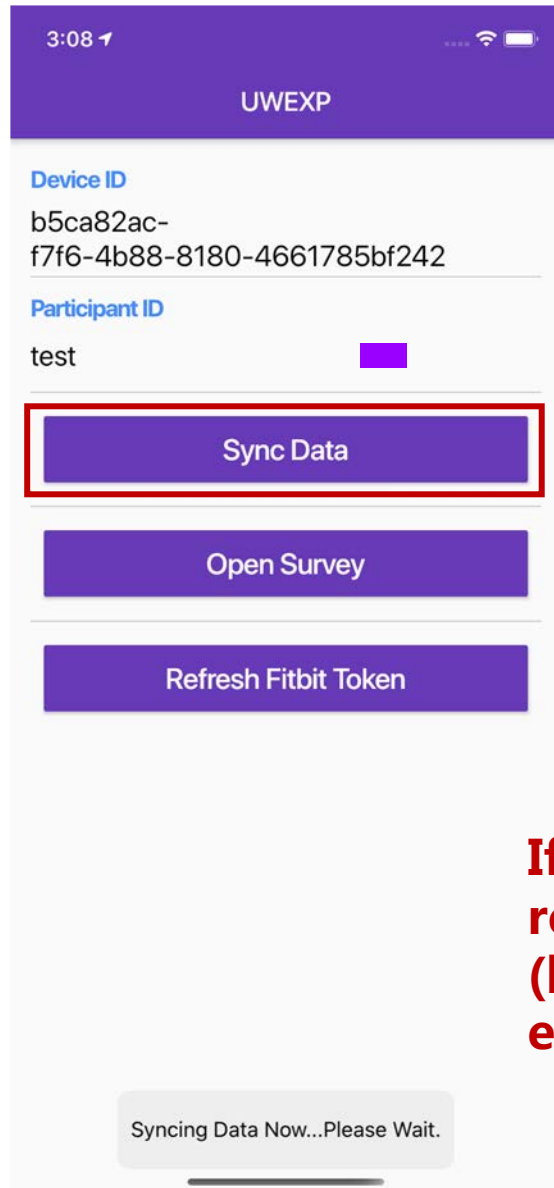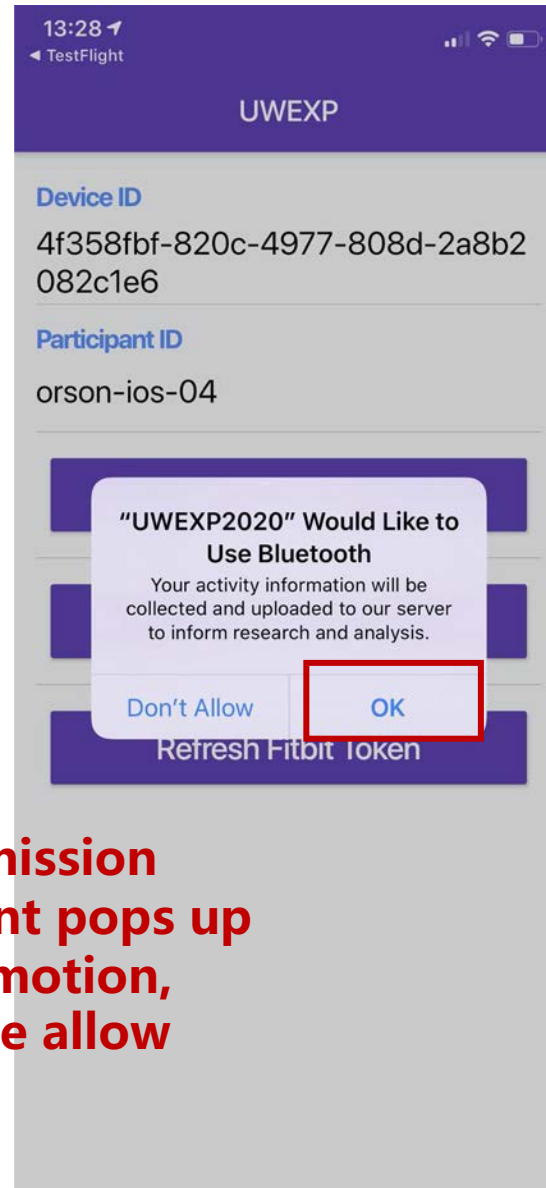

If any permission requirement pops up (location, motion, etc.), please allow

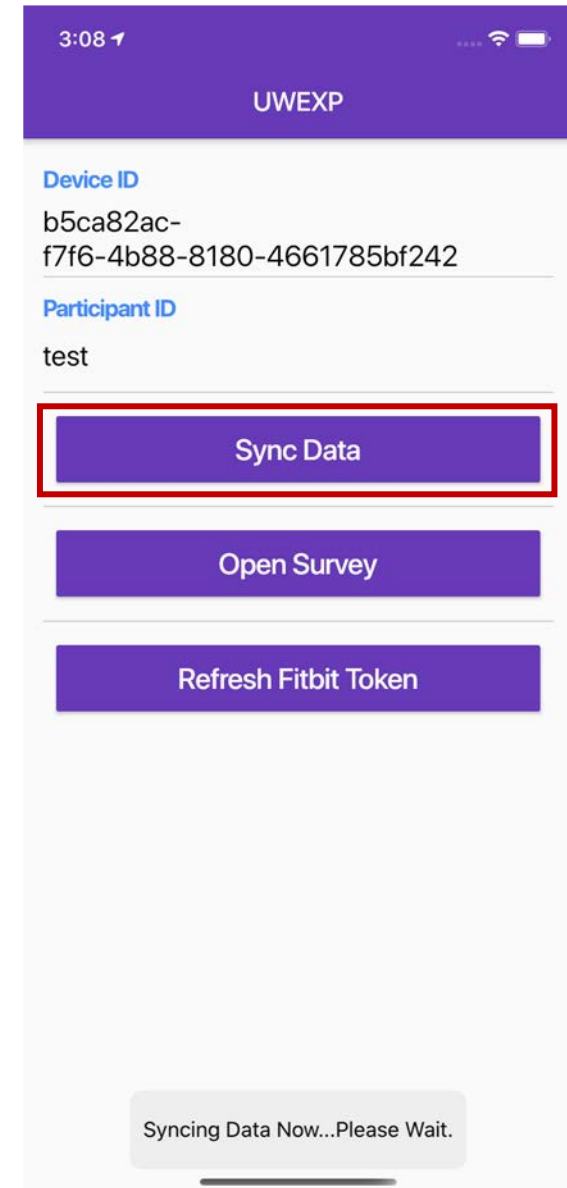

All set!

# Always allow location access

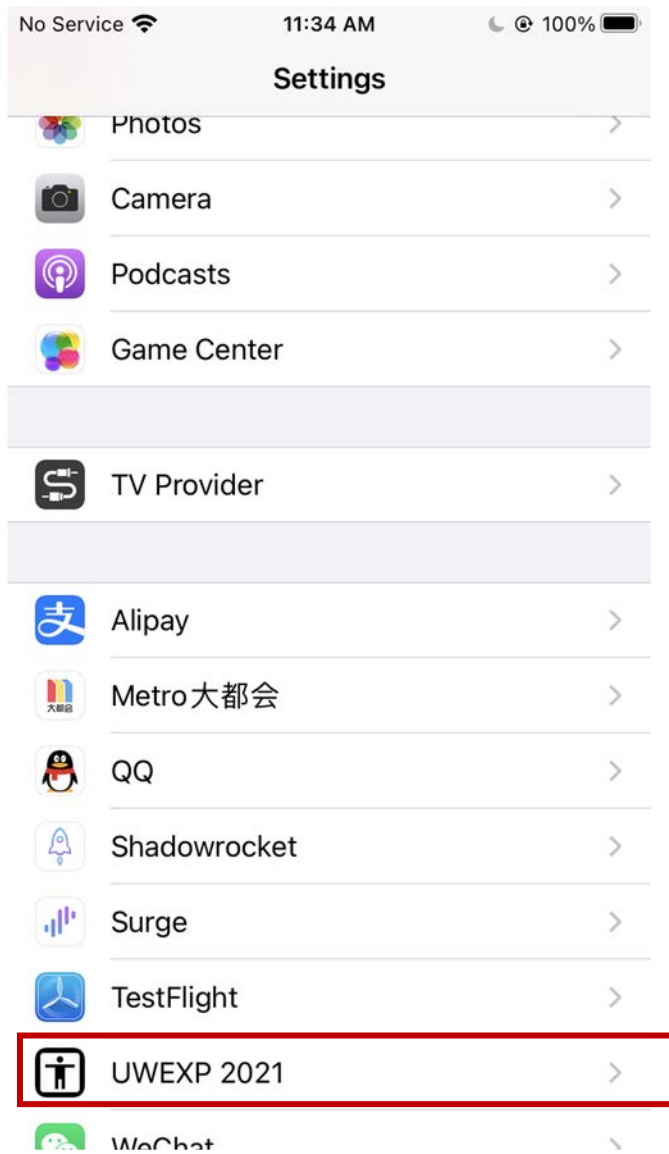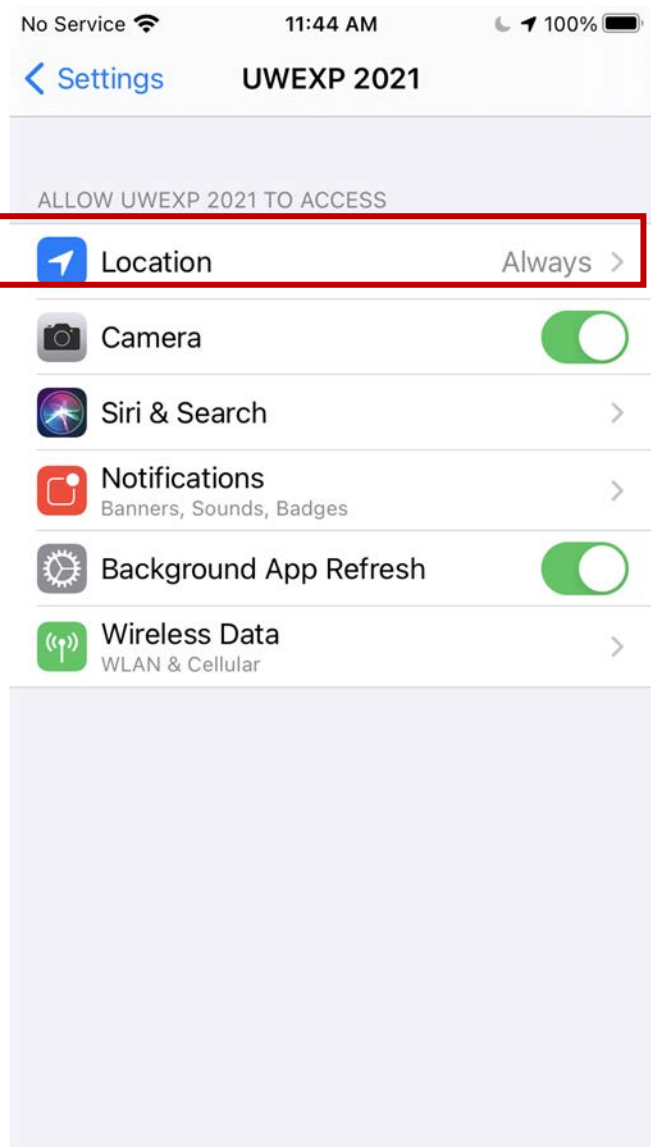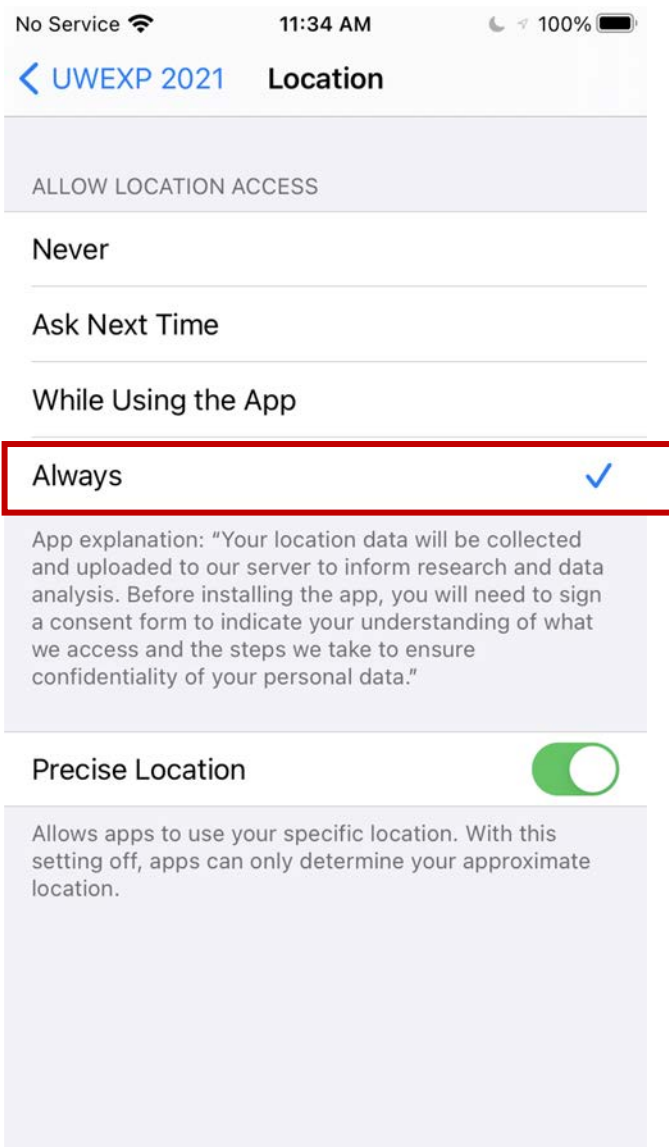

**Please make sure that both Fitbit and  
UWEXP are active in the background!**

**Please avoid low-power mode as much as  
possible!**

**If you accidentally kill them, that's fine.  
Just go ahead and relaunch it.**



**UWEXP – Answer a survey**

**iOS**

# Answer a survey through a notification

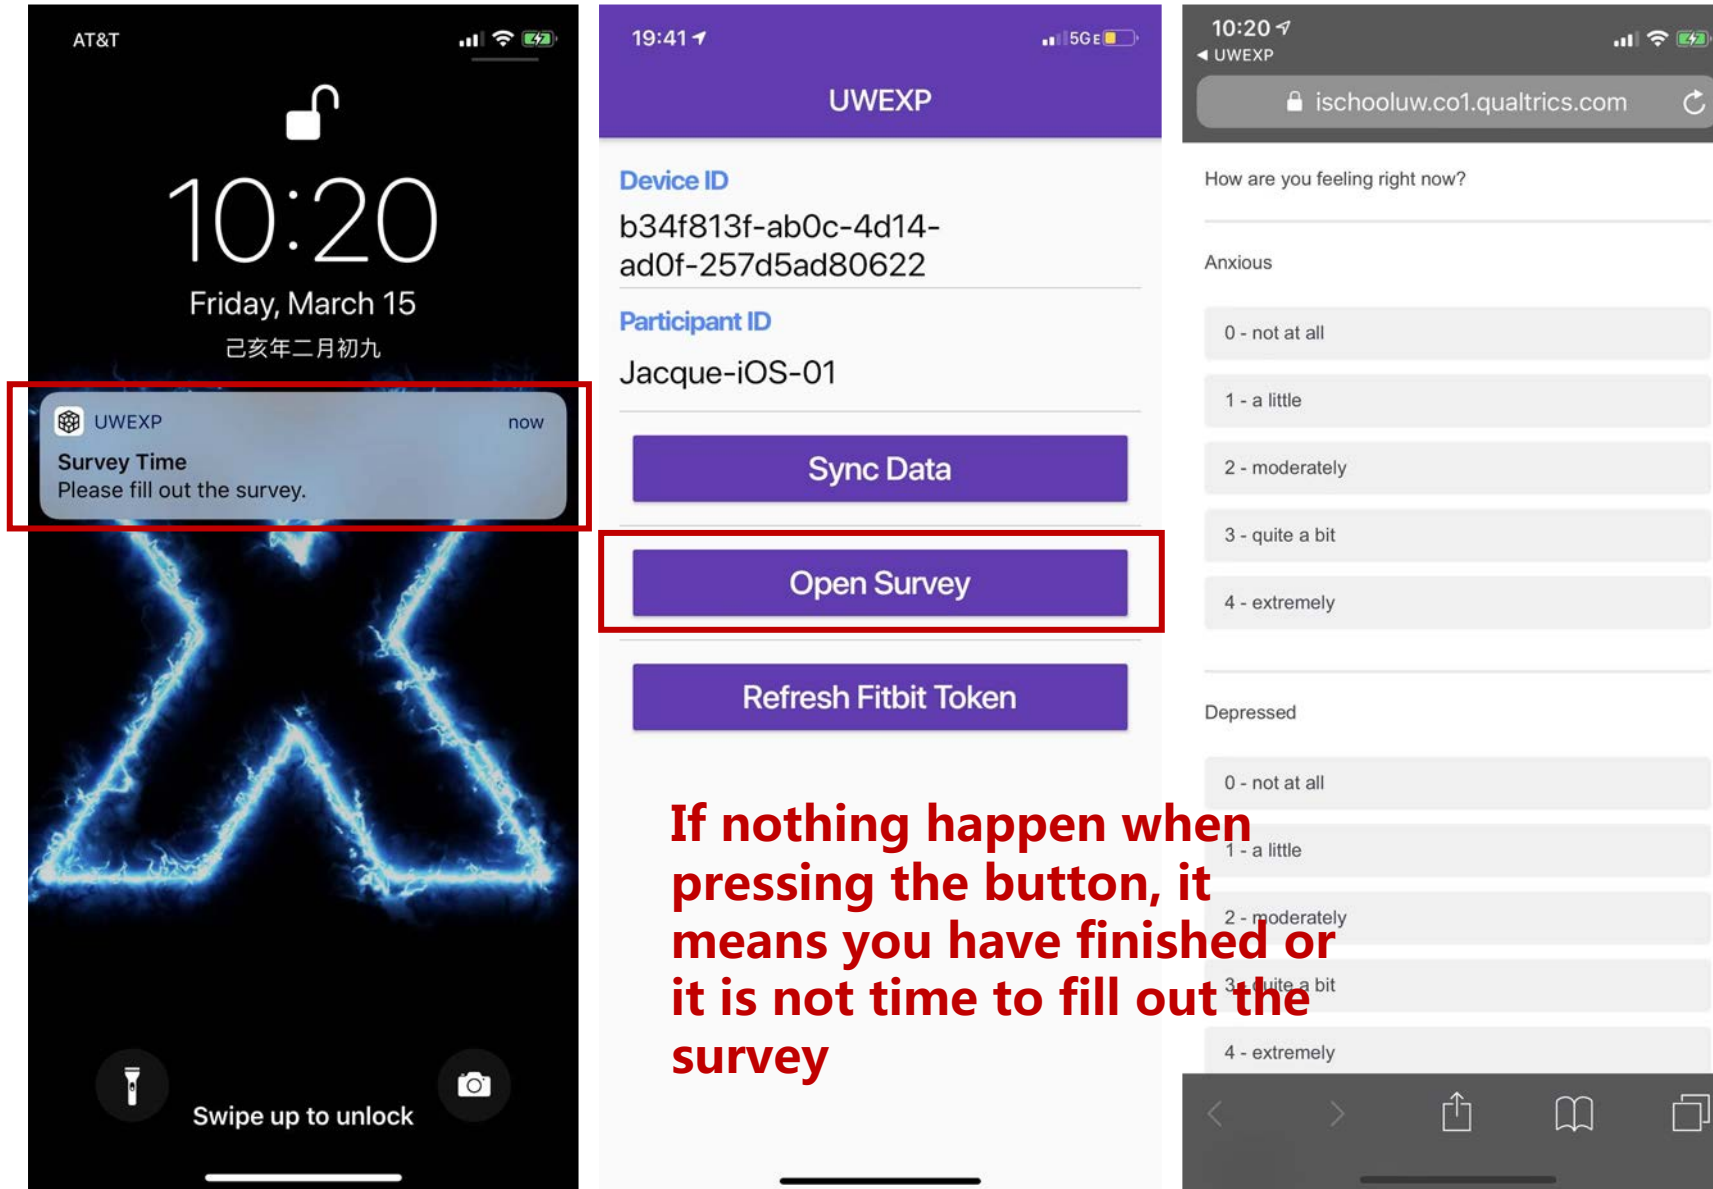

If nothing happen when pressing the button, it means you have finished or it is not time to fill out the survey

Open the survey in the app

Scroll down and answer the survey

If you do not answer the survey, it will keep sending notification **every 1 hours**.

If you do not fill out it in **12 hours (bi-weekly survey)/ 2 hours (quad-daily survey)**, the survey will **expire**.

# Answer a survey through a button

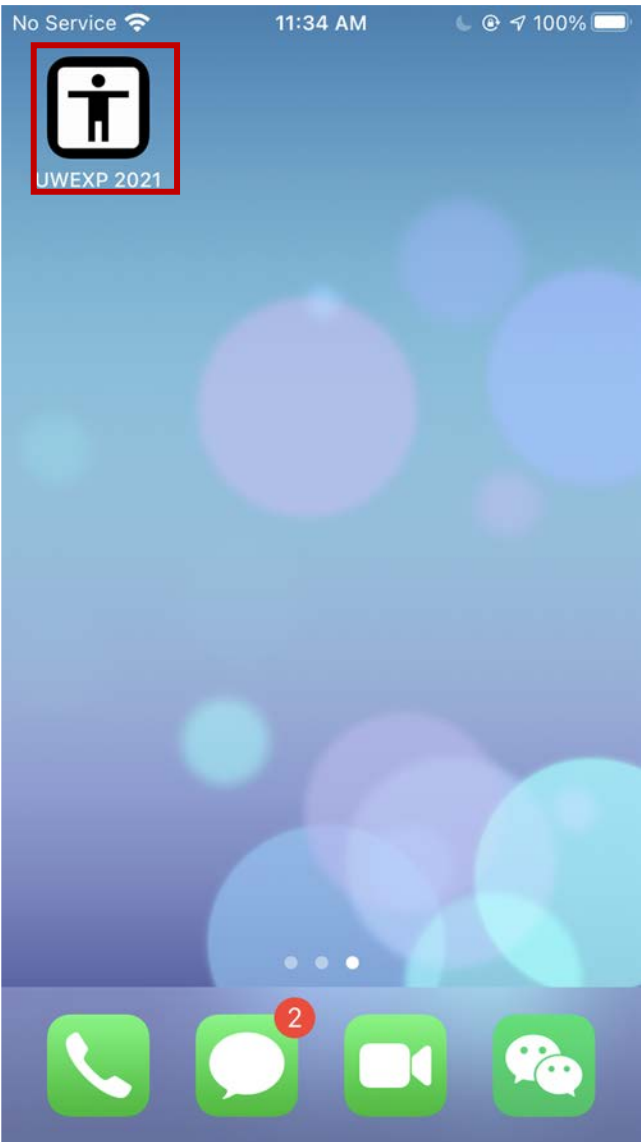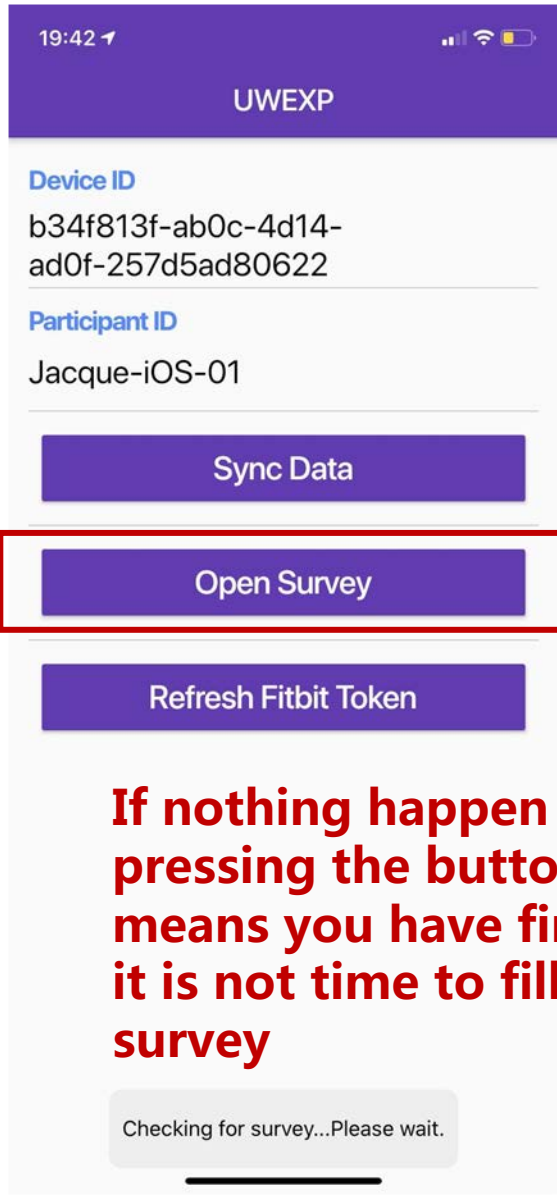

**If nothing happen when pressing the button, it means you have finished or it is not time to fill out the survey**

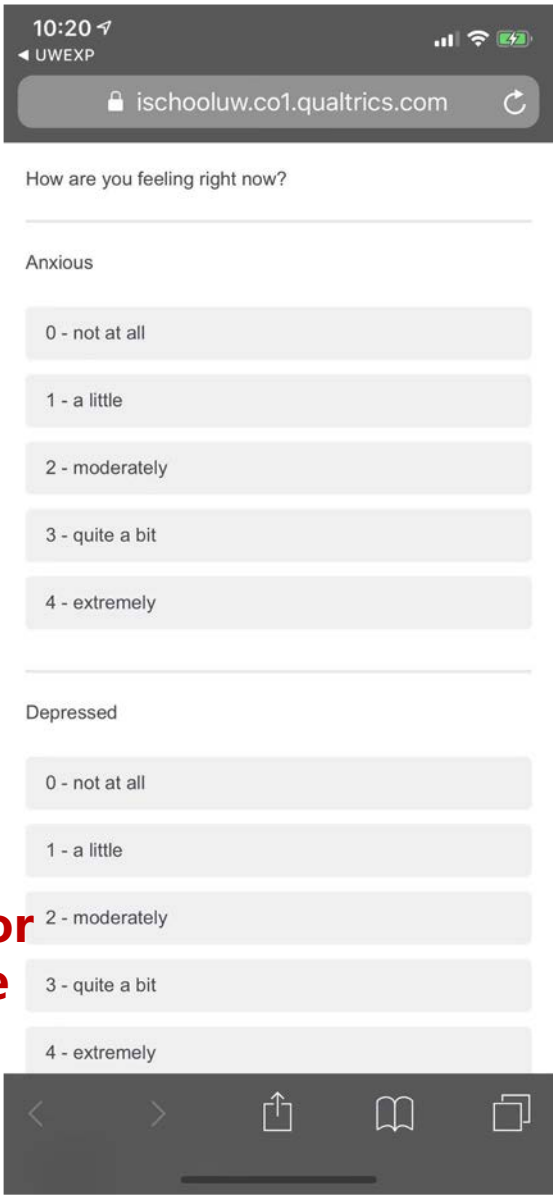

# **UWEXP – Manual Data Upload (ideally not needed)**

**iOS**

# Manually upload data

There are chances that UWEXP staffs will reach out to you to ask you to “manually upload data” . And this is all what you need to do:

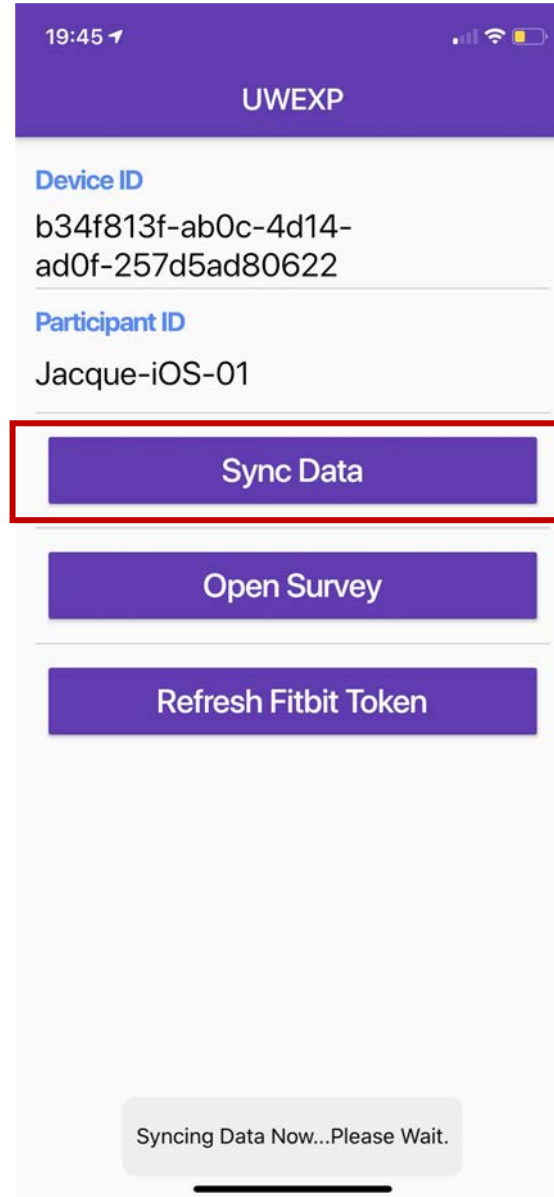

Before you pressed the button, please make sure that your phone is connected to WiFi and being charged.
